# Supplementary material for: Cost-effectiveness of household contact investigation for detection of tuberculosis in Pakistan
Source: PubMed Central journal article supplement — BMJ Open. 2021 Oct 22;11(10):e049658. doi: 10.1136/bmjopen-2021-049658 (PMC8543626; doi:10.1136/bmjopen-2021-049658), 2021-10-22
Supplement: bmjopen-2021-049658.draft_revisions.pdf [file bmjopen-2021-049658.draft_revisions.pdf]

# BMJ Open

BMJ Open is committed to open peer review. As part of this commitment we make the peer review history of every article we publish publicly available.

When an article is published we post the peer reviewers' comments and the authors' responses online. We also post the versions of the paper that were used during peer review. These are the versions that the peer review comments apply to.

The versions of the paper that follow are the versions that were submitted during the peer review process. They are not the versions of record or the final published versions. They should not be cited or distributed as the published version of this manuscript.

BMJ Open is an open access journal and the full, final, typeset and author-corrected version of record of the manuscript is available on our site with no access controls, subscription charges or pay-per-view fees (<http://bmjopen.bmj.com>).

If you have any questions on BMJ Open's open peer review process please email [info.bmjopen@bmj.com](mailto:info.bmjopen@bmj.com)

# BMJ Open

## Cost-effectiveness of household contact investigation for detection of tuberculosis in Pakistan

|                               |                                                                                                                                                                                                                                                                                                                                                                                                                                                                                                                                                                                                                                                                                                                                                                                                                                                                              |
|-------------------------------|------------------------------------------------------------------------------------------------------------------------------------------------------------------------------------------------------------------------------------------------------------------------------------------------------------------------------------------------------------------------------------------------------------------------------------------------------------------------------------------------------------------------------------------------------------------------------------------------------------------------------------------------------------------------------------------------------------------------------------------------------------------------------------------------------------------------------------------------------------------------------|
| Journal:                      | <i>BMJ Open</i>                                                                                                                                                                                                                                                                                                                                                                                                                                                                                                                                                                                                                                                                                                                                                                                                                                                              |
| Manuscript ID                 | bmjopen-2021-049658                                                                                                                                                                                                                                                                                                                                                                                                                                                                                                                                                                                                                                                                                                                                                                                                                                                          |
| Article Type:                 | Original research                                                                                                                                                                                                                                                                                                                                                                                                                                                                                                                                                                                                                                                                                                                                                                                                                                                            |
| Date Submitted by the Author: | 30-Jan-2021                                                                                                                                                                                                                                                                                                                                                                                                                                                                                                                                                                                                                                                                                                                                                                                                                                                                  |
| Complete List of Authors:     | Hussain, Hamidah; Universitetet i Bergen, Centre for International Health, Department of Global Public Health and Primary Care; Interactive Research and Development (IRD) Global<br>Malik, Aryn; Interactive Research and Development (IRD) Global<br>Ahmed, Junaid; Indus Health Network, Global Health Directorate<br>Siddiqui, Sara; Indus Health Network, Global Health Directorate<br>Amanullah, Farhana; The Indus Hospital<br>Creswell, Jacob; Stop TB Partnership<br>Tylleskär, Thorkild; Universitetet i Bergen, Centre for International Health, Department of Global Public Health and Primary Care<br>Robberstad, Bjarne; Universitetet i Bergen, Centre for International Health, Department of Global Public Health and Primary Care;<br>Universitetet i Bergen, Section for Ethics and Health Economics, Department of Global Public Health and Primary Care |
| Keywords:                     | Tuberculosis < INFECTIOUS DISEASES, HEALTH ECONOMICS, Health policy < HEALTH SERVICES ADMINISTRATION & MANAGEMENT                                                                                                                                                                                                                                                                                                                                                                                                                                                                                                                                                                                                                                                                                                                                                            |
|                               |                                                                                                                                                                                                                                                                                                                                                                                                                                                                                                                                                                                                                                                                                                                                                                                                                                                                              |

SCHOLARONE™  
Manuscripts

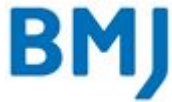

I, the Submitting Author has the right to grant and does grant on behalf of all authors of the Work (as defined in the below author licence), an exclusive licence and/or a non-exclusive licence for contributions from authors who are: i) UK Crown employees; ii) where BMJ has agreed a CC-BY licence shall apply, and/or iii) in accordance with the terms applicable for US Federal Government officers or employees acting as part of their official duties; on a worldwide, perpetual, irrevocable, royalty-free basis to BMJ Publishing Group Ltd ("BMJ") its licensees and where the relevant Journal is co-owned by BMJ to the co-owners of the Journal, to publish the Work in this journal and any other BMJ products and to exploit all rights, as set out in our [licence](#).

The Submitting Author accepts and understands that any supply made under these terms is made by BMJ to the Submitting Author unless you are acting as an employee on behalf of your employer or a postgraduate student of an affiliated institution which is paying any applicable article publishing charge ("APC") for Open Access articles. Where the Submitting Author wishes to make the Work available on an Open Access basis (and intends to pay the relevant APC), the terms of reuse of such Open Access shall be governed by a Creative Commons licence – details of these licences and which [Creative Commons](#) licence will apply to this Work are set out in our licence referred to above.

Other than as permitted in any relevant BMJ Author's Self Archiving Policies, I confirm this Work has not been accepted for publication elsewhere, is not being considered for publication elsewhere and does not duplicate material already published. I confirm all authors consent to publication of this Work and authorise the granting of this licence.

# Cost-effectiveness of household contact investigation for detection of tuberculosis in Pakistan

## Corresponding author:

### Hamidah Hussain

Interactive Research and Development (IRD) Global,  
Centre for International Health, Department of Global Public Health and Primary Care,  
University of Bergen, Norway  
583 Orchard Road, #06-01 Forum, Singapore 238884, Singapore;  
[Hamidah.hussain@ird.global](mailto:Hamidah.hussain@ird.global)  
Tel: +1 647 574 7918

### Amy A. Malik

Interactive Research and Development (IRD) Global, Singapore 238884, Singapore;  
Global Health Directorate, Indus Health Network, Karachi 75190, Pakistan

### Junaid F. Ahmed

Global Health Directorate, Indus Health Network, Karachi 75190, Pakistan

### Sara Siddiqui

Global Health Directorate, Indus Health Network, Karachi 75190, Pakistan

### Farhana Amanullah

The Indus Hospital, Karachi 75190, Pakistan

### Jacob Creswell

Stop TB Partnership, Geneva, 1218, Switzerland

### Thorkild Tylleskär

Centre for International Health, Department of Global Public Health and Primary Care,  
University of Bergen, Norway

### Bjarne Robberstad

Centre for International Health, Department of Global Public Health and Primary Care,  
University of Bergen, Norway  
Section for Ethics and Health Economics, Department of Global Public Health and Primary Care,  
University of Bergen, Norway

**Word Count: 3760**

**Key words:** Passive contact investigation, Enhanced contact investigation, Active contact investigation, Cost effectiveness analysis

## Abstract

### Objectives

Despite WHO guidelines recommending household contact investigation, and studies showing the impact of active screening, most TB programs in resource-limited settings only carry out passive contact investigation. The cost of such strategies are often cited as barriers to their implementation. However, little data is available for the additional costs required to implement this strategy. We aimed to estimate the cost and cost-effectiveness of active contact investigation as compared to passive contact investigation in urban Pakistan

### Design, participants and intervention:

We estimated the cost-effectiveness of ‘enhanced’ and ‘active’ contact investigations compared to ‘passive’ contact investigation from providers and the program’s perspective using a simple decision tree.

### Setting and primary and secondary outcome measures:

Costs were collected in Pakistan from a TB clinic performing passive contact investigation and from studies of active contact tracing interventions conducted. The effectiveness was based on the number of TB patients identified among household contacts screened.

## Results

The addition of enhanced contact investigation to the existing passive mode detected 3.7 times more cases of TB per index patient compared to passive contact investigation alone. The incremental cost was USD 30 per index patient, which yielded an incremental cost of USD 120 per incremental patient identified with TB. The active contact investigation was 1.5 times more effective than enhanced contact investigation with an incremental cost of USD 238 per incremental TB patient identified.

## Conclusion

Our results show that enhanced and active approaches to contact investigation effectively identify additional patients with TB amongst household contacts at a relatively modest cost.

These strategies can be added to the passive contact investigation in a high burden setting to find the people with TB who are missed and meet the End TB strategy goals.

**Strengths and limitations of this study:**

- The study was performed alongside implementation in district tuberculosis clinics in a high-prevalence setting.
- It is one of the first ones to compare the cost effectiveness of multiple active contact investigation approaches.
- The latest WHO guidelines identifies the comparisons of different types of contact investigation as a current knowledge gap and our findings aid this void.
- The study did not consider out-of-pocket expenditures for patients which leads to underestimation of the overall costs for contact investigation.

## Background

Tuberculosis (TB) remains a leading cause of morbidity and mortality, especially in low- and middle-income countries. According to the latest estimates, 10 million people fell ill with TB in 2019, though only 7.1 million were reported to national programmes. Eight countries account for two-thirds of the reported TB burden in the world: India (26%), Indonesia (8.5%), China (8.4%), the Philippines (6%), Pakistan (5.7%), Nigeria (4.4%), Bangladesh (3.6%) and South Africa (3.6%).<sup>1,2,3</sup> Reasons for the gap between estimated and notified individuals with TB include limited access to health care, poor diagnosis capacity for people who do access care, as well as underreporting of people diagnosed.<sup>4,5,6</sup>

Undiagnosed people with TB continue to transmit TB to others. The risk of transmission is particularly high amongst members of households living with people with undiagnosed pulmonary TB. Studies have documented an infection rate of 30-50% amongst household contacts of infectious adults, with the infection rate in children under 5 being as high as 72%.<sup>7,8</sup> Of those infected with TB, 10-20% develop the disease over their lifetimes, and this number is even higher for people who are immunocompromised, for example when they are co-infected with HIV.<sup>9,10,11,12</sup>

Household contact investigation is recommended as a means to address these challenges.<sup>13,14</sup> In the light of the high infection rates, household contact investigation is a critical activity for TB programs for two reasons. First, it allows early identification of additional household members who are also sick with TB and require immediate treatment, stopping transmission. Second, it allows programs to identify people who can benefit from the treatment of TB infection (TBI) to



1  
2  
3 prevent disease progression, importantly children and people living with HIV. A meta-analysis  
4 of contact investigation showed that 3.1% of contacts in low-resource settings and 1.4% of  
5 contacts in high-resource settings have TB disease, making this a potential high yield strategy to  
6 find people with TB.<sup>15,16</sup> A large proportion of childhood TB can be identified through contact  
7 investigation, which is of particular value since global rates of detection among children are  
8 much lower than for adults.<sup>1</sup>  
9

10  
11 Household contact investigation can be carried out in many different ways along a continuum of  
12 passive or active approaches.<sup>17</sup> In passive contact tracing, the index patient is asked to bring in  
13 their family members for screening to the facility, while in active contact tracing, health care  
14 workers visit the index patient's home. An 'enhanced' form of contact tracing between the active  
15 and passive modes, in which health workers make reminder phone calls and follow up with the  
16 family and encourages them to come to the facility for screening can also be delivered.  
17  
18

19  
20 Despite WHO guidelines recommending household contact investigation<sup>18,19</sup> and studies  
21 documenting the outcomes of active approaches the most TB programs in resource-limited  
22 settings only carry out passive contact investigation and even then, implementation is limited.<sup>20,21</sup>  
23 A cluster-randomized controlled trial demonstrated that contact investigation plus passive case  
24 finding (PCF) was beneficial compared to passive case finding alone.<sup>22</sup> The cost of active contact  
25 investigation, including additional efforts required by already stretched health care providers, has  
26 often been cited as a barrier to its implementation.<sup>23</sup> However, little data is available for the  
27 additional cost of implementing active contact investigation, and especially so when  
28 implemented under routine program conditions. A study from Malaysia reported the cost of  
29  
30  
31  
32  
33  
34  
35  
36  
37  
38  
39  
40  
41  
42  
43  
44  
45  
46  
47  
48  
49  
50  
51  
52  
53  
54  
55  
56  
57  
58  
59  
60

1  
2  
3 active contact investigation to be USD 6.60 per a single contact tracing visit with a yield of  
4  
5 0.5%.<sup>24</sup> In Peru, adding active contact tracing to PCF incurred an incremental cost of USD 48.8  
6  
7 to evaluate household contacts of an index TB patient, with an incremental cost-effectiveness  
8  
9 ratio (ICER) of USD 1811 per DALY averted.<sup>25</sup> We were not able to identify studies reporting  
10  
11 costs or cost-effectiveness for the enhanced mode of contact tracing.  
12  
13  
14  
15

16  
17 The objective of this study was to estimate the cost and cost-effectiveness of the enhanced and  
18  
19 active contact tracing interventions in a high-burden programmatic setting, compared to the  
20  
21 existing passive approach.  
22  
23  
24  
25  
26  
27

## 28 **Methods**

### 29 **SETTING**

30  
31  
32 The costing study was a subset of a larger study where an active case finding intervention was  
33  
34 implemented for children with TB. The study was conducted at four TB treatment and reporting  
35  
36 centres in Kotri, a rural town in Sindh, Pakistan. All children presenting to these facilities were  
37  
38 verbally screened for symptoms of TB and those considered to be at high risk of having TB were  
39  
40 further investigated. Children diagnosed with TB were started on treatment, and we conducted  
41  
42 contact investigation for their household contacts.<sup>26</sup> The household contact investigation for  
43  
44 adults and children identified with TB reported here was carried out at one of the four centers  
45  
46  
47 (Institute of Chest Disease Hospital) from April 2015 to March 2016.  
48  
49  
50  
51  
52  
53  
54  
55  
56  
57  
58  
59  
60

## INTERVENTIONS

For the study, the index patient was the first person identified with TB in the family, while household contacts were defined as people living in the same household as the index patient.

In passive contact investigation, index patients were counselled to bring their household contacts for evaluation. Contacts who responded were evaluated for TB symptoms and risk factors. A limitation of this approach in regular practice, people screened were recorded only as a TB contact and not linked directly to the index TB patient in a specific household. There was no routine follow-up to see if the specific contacts attended the facility for screening or not.

Enhanced contact investigation added a step to the passive approach. Adults and guardians of children under 15 years of age newly diagnosed with TB were asked about the presence of TB symptoms or household members on TB treatment in their families. They were counselled to bring their enumerated household contacts for evaluation, as in the passive approach. If the enumerated household contacts did not come to the facility for assessment after one week, a reminder phone call was made, followed by second phone call after another week. If the family still had not come two weeks after the second phone reminder, active contact investigation was implemented. Active contact investigation included health workers conducting a household visit to verbally screen the family at home and to counsel the family to go to the clinic for further evaluation (Figure 1).

At the clinic, enumerated household contacts were screened by existing TB doctors in the passive system or by trained health workers for enhanced and active contact investigation. All contacts were verbally screened for symptoms of TB such as cough of more than two weeks,

1  
2  
3 contact with someone other than the index patient who had TB, glandular swelling, fever lasting  
4 more than two weeks, night sweats and inappropriate weight loss. Individuals with suggestive  
5 symptoms or additional exposure were referred to the project's medical officer for further  
6 evaluation. They then received a chest x-ray and were asked to provide a sputum sample for  
7 smear microscopy. A complete blood count (CBC) and erythrocyte sedimentation rate (ESR)  
8 was done for child contacts to aid in diagnosis as indicated. Contacts diagnosed with TB were  
9 started on TB treatment in line with the National TB Program (NTP) guidelines. Children under  
10 five years of age in whom TB disease was ruled out were offered isoniazid preventive therapy  
11 (IPT) as per NTP guidelines.<sup>26</sup> All clinical evaluations and investigations were provided without  
12 any charge to the contacts.  
13  
14  
15  
16  
17  
18  
19  
20  
21  
22  
23  
24  
25  
26  
27

## 28 DATA COLLECTION

29  
30 For the passive approach, health facility staff recorded data using a paper-based system which  
31 were then abstracted for the study. For enhanced and active contact interventions project based  
32 trained community health workers and doctors administered questions to assess TB  
33 symptoms/risks and documented results of clinical evaluation and diagnostic tests using a  
34 custom-built smart-phone based data collection application with built-in decision support  
35 developed for the project.<sup>26</sup>  
36  
37  
38  
39  
40  
41  
42  
43  
44  
45

## 46 COST PARAMETERS

47  
48 Costs for this systematic contact tracing activities were collected from the perspective of the  
49 operational program and the health facility and included recurrent and capital cost items. As  
50 capital costs for the building were not available, we approximated rent and utilities of running a  
51 similar structure, and we used these in place of the capital costs.  
52  
53  
54  
55  
56  
57  
58  
59  
60

1  
2  
3  
4  
5 We identified cost items and quantified resource use for all activities related to contact  
6 investigation. They included personnel, diagnostic test, supervision and monitoring by facility or  
7 project staff and communications. For the passive system, cost information was obtained from  
8 the health facility accounting system. We identified one physician and one health worker who  
9 were involved in the existing passive system at the TB clinic. We estimated their time spent on  
10 evaluation of household contacts through expert opinion and allocated salaries proportionate to  
11 this time as compared to other activities. Unit costs for TB diagnostic tests, chest x-rays, and  
12 smear microscopy were as billed to the project by the health facility. Costs for diagnostic tests  
13 were estimated by multiplying their unit costs with the number of people tested. As  
14 communications, supervision and training costs for the existing passive program were not  
15 available through the facility records, we assumed the same costs as incurred by the enhanced  
16 contact investigation intervention. At the TB clinic, data was collected on paper-based systems  
17 and the costs for registers and forms are reported with stationary.

18  
19  
20  
21  
22  
23  
24  
25  
26  
27  
28  
29  
30  
31  
32  
33  
34  
35  
36  
37  
38 For the additional costs of performing enhanced and active contact investigations, data were  
39 extracted from the project accounting system. One full-time health worker was recruited for  
40 enhanced intervention while the active contact investigation required three additional health  
41 workers. A fixed amount of travel costs for home visits was built into the salary for health  
42 workers. For all other personnel such as physician, field supervisor and program coordinators,  
43 time spent on the contact investigation intervention was estimated using an activity-based costing  
44 (ABC) methodology, and costs were allocated according to the proportion of time spent on the  
45 intervention relative to other activities.<sup>27,28</sup> Cost of diagnostic investigations per person screened

1  
2  
3 (chest x-ray, smear microscopy and complete blood), communications (data and phone), training  
4 and stationery were as incurred. The cost for the development of electronic data capture was  
5  
6 allocated based on the number of patients screened in each intervention, while the cost of phones  
7  
8 and laptops used to capture data were allocated as per the personnel time that used them. We  
9  
10 annuitized these capital costs over a period of three years using a 3% discount rate.<sup>29,30</sup> Costs  
11  
12 were collected in Pakistan Rupees and converted to US dollars using the average exchange rate  
13  
14 for the years 2015 and 2016 (1 USD =103.1 PKR).  
15  
16  
17  
18  
19  
20

## 21 EFFECTIVENESS OF CONTACT INVESTIGATION

22  
23 The effectiveness of the contact investigation procedure was evaluated based on the  
24  
25 number of people with TB identified per household screened after verbal screening and  
26  
27 diagnostic tests. Our study was divided into baseline and intervention periods. Passive  
28  
29 contact investigation was performed in the baseline period and used as the comparator. In  
30  
31 the year preceding the intervention, the passive approach screened 762 contacts from a  
32  
33 total of 231 index patient households to identify 21 people with TB during this baseline  
34  
35 period (Figure 1). During the intervention period, enhanced and active contact  
36  
37 investigation were implemented, and contacts from 300 households were evaluated. Of  
38  
39 these, 1130 people from 144 families came to the health facility after phone reminders  
40  
41 (enhanced) and 102 were diagnosed with TB. When home visits were conducted for 156  
42  
43 households that failed to respond to the enhanced strategy (active), we evaluated 1224  
44  
45 people and identified 53 additional people with TB disease (Figure 1).  
46  
47  
48  
49  
50  
51  
52  
53  
54  
55  
56  
57  
58  
59  
60

## DECISION MODEL AND ANALYSIS

A simple decision tree was created in TreeAge Pro 2020 (TreeAge Pro Inc., Williamston, MA) to estimate the cost-effectiveness of enhanced and active contact investigation compared to passive contact investigation. The decision tree includes the three alternatives for contact investigation; (i) Passive, (ii) Passive + Enhanced and (iii) Passive + Enhanced +Active (Figure 2). The three intervention alternatives represent different levels of intensity of contact investigation and are considered to be mutually exclusive. The more intense alternatives are more expensive than the less intensive ones, but also represent new possibilities for identifying contacts with TB (Table 1). The results are presented as absolute and incremental costs and TB patients identified, and incremental cost-effectiveness ratios (ICERs) between the alternatives.

We conducted probabilistic sensitivity analyses (PSA) using Monte Carlo simulations with 10,000 iterations to explore the effects of combined uncertainties in key parameters. Gamma distributions were used for cost parameters, and beta distributions for the probability of TB patients per family screened.<sup>31</sup> For sensitivity analyses, upper and lower values were defined for each parameter as mean values  $\pm 20\%$ .

Ethical approval was obtained from the Institutional Review Board (IRB) of Interactive Research and Development (IRD), OHRP Registration No. 00005148.

**Table 1: Modeling inputs, assumptions and ranges for passive, enhanced and active contact investigation (CI).**

| <b>Interventions</b>           | <b>Total cost (USD)</b> | <b>Index patient with TB</b> | <b>Total contacts diagnosed with TB (Lower and Upper limit)</b> | <b>Cost per index TB patient family screened (USD)</b> | <b>Probability of finding a TB patient per household screened (Lower and Upper limit)</b> |
|--------------------------------|-------------------------|------------------------------|-----------------------------------------------------------------|--------------------------------------------------------|-------------------------------------------------------------------------------------------|
| Passive CI                     | 10,659                  | 231                          | 21 (17– 25)                                                     | 46 (37-55)                                             | 0.09 (0.07 – 0.10)                                                                        |
| Passive + Enhanced CI          | 19,597                  | 300                          | 102 (82 – 122)                                                  | 76 (61 – 91)                                           | 0.34 (0.27 – 0.40)                                                                        |
| Passive + Enhanced + Active CI | 32,282                  | 300                          | 155 (124 – 186)                                                 | 118 (94 – 142)                                         | 0.52 (0.41 – 0.62)                                                                        |



## Results

In the enhanced and active contact tracing, 2,354 household contacts from 300 index patients were screened, of whom 49% were children less than 15 years of age, and 45% were female. The mean age for child contacts was 6.4 years (SD 3.7, IQR: 3-9), and 54% were males and the mean age for adult contacts was 33 years (SD 13.4, IQR: 21-41) and 53% were males. The enhanced contact investigation intervention was able to find 2.45 times (95% CI: 1.52 – 4.14) more people with TB than the passive program when it was implemented. While the active intervention implemented three weeks following the index patient counselling identified 2.11 times (95% CI: 1.33 – 3.52) more people with TB compared to passive contact investigation.

Overall, the passive program incurred USD 10,659 over one year and it cost USD 46 per household screened with TB. The enhanced contact investigation incurred an additional USD 30 to screen a household with an overall addition of USD 8,938 to the yearly program cost. Of the additional costs, human resources (42%) and electronic data collection (24%) were the most significant cost drivers. Active contact investigation incurred an additional USD 42 per household screened for TB above the enhanced model, and the program cost a further USD 12,685 to the enhanced contact investigation of which human resources (57%) and electronic data capture (18%) were the largest components. (Table 2)

**Table 2: Cost (USD) of household contact screening for passive, enhanced and active contact investigation activities (upper panel), and cumulative costs per intervention arm (lower panel).**

| <b>INTERVENTION ACTIVITIES</b>                                                                 | <b>Passive contact investigation<br/>N=231 (%)</b> | <b>Enhanced contact investigation<br/>N=300 (%)</b> | <b>Active contact investigation<br/>N=300 (%)</b> |
|------------------------------------------------------------------------------------------------|----------------------------------------------------|-----------------------------------------------------|---------------------------------------------------|
| <b>Cost categories</b>                                                                         |                                                    |                                                     |                                                   |
| <b><u>Recurrent costs:</u></b>                                                                 |                                                    |                                                     |                                                   |
| Clinic rental and maintenance                                                                  | 3,492 (33)                                         | -                                                   | -                                                 |
| Personnel                                                                                      | 5,354 (50)                                         | 3,835 (42)                                          | 7,348 (57)                                        |
| Diagnostic tests                                                                               | 1,478 (14)                                         | 2,192 (24)                                          | 2,374 (18)                                        |
| Supervision and monitoring                                                                     | 116 (1)                                            | 195 (2)                                             | 39 (0)                                            |
| Communication                                                                                  | 58 (1)                                             | 204 (2)                                             | 204 (2)                                           |
| Training                                                                                       | 72 (1)                                             | 72 (1)                                              | 70 (1)                                            |
| Stationary                                                                                     | 88 (1)                                             | 22 (0)                                              | 24 (0)                                            |
| <b>Subtotal recurrent costs</b>                                                                | <b>10,659</b>                                      | <b>6,520</b>                                        | <b>10,096</b>                                     |
|                                                                                                |                                                    |                                                     |                                                   |
| <b><u>Capital costs:</u></b>                                                                   |                                                    |                                                     |                                                   |
| Equipment                                                                                      | -                                                  | 407 (4)                                             | 407 (3)                                           |
| Data collection system and maintenance                                                         | -                                                  | 2,236 (24)                                          | 2,422 (19)                                        |
| <b>Subtotal capital costs</b>                                                                  |                                                    | <b>2,463</b>                                        | <b>2,829</b>                                      |
| <b>Annuitized capital costs (3% discount rate)</b>                                             |                                                    | <b>2,419</b>                                        | <b>2,589</b>                                      |
|                                                                                                |                                                    |                                                     |                                                   |
| <b>Total costs per activity</b>                                                                | <b>10,659</b>                                      | <b>8,938</b>                                        | <b>12,685</b>                                     |
| <b>Total costs per activity per index patient</b>                                              | <b>46</b>                                          | <b>30</b>                                           | <b>42</b>                                         |
|                                                                                                |                                                    |                                                     |                                                   |
| <b>INTERVENTION ARM</b>                                                                        | <b>Passive</b>                                     | <b>Passive + Enhanced</b>                           | <b>Passive + Enhanced + Active</b>                |
| <b>Total cumulated costs per index patient per arm for household contacts evaluated for TB</b> | <b>46</b>                                          | <b>76</b>                                           | <b>118</b>                                        |
| <b>Number of contacts diagnosed with TB</b>                                                    | <b>21</b>                                          | <b>123</b>                                          | <b>176</b>                                        |

The passive + enhanced contact investigation of one index patient was 3.8 times more effective than passive contact investigation alone, increasing absolute case detection rate from 0.09 to 0.34. The incremental cost was USD 30 per index patient, which yielded an incremental cost of USD 120 per incremental patient identified with TB. While the passive + enhanced + active contact investigation of one index patient was 1.5 times more effective than enhanced contact investigation with an incremental cost of USD 238 per incremental TB patient identified as compared to the baseline passive approach (Table 3).

**Table 3: Incremental cost-effectiveness of household contact screening for passive, enhanced and active contact investigation interventions from the TB program perspective.**

| Strategy                                          | Cost per strategy (C) | Incremental Cost (IC) | Effect (E) | Incremental Effect (IE) | ICER |
|---------------------------------------------------|-----------------------|-----------------------|------------|-------------------------|------|
| Passive contact investigation                     | 46                    |                       | 0.09       |                         |      |
| Passive + Enhanced contact investigation          | 76                    | 30                    | 0.34       | 0.25                    | 120  |
| Passive + Enhanced + Active contact investigation | 118                   | 42                    | 0.52       | 0.18                    | 238  |

The cost-effectiveness acceptability curves (CEACs) illustrate the probabilities that each intervention is cost-effective for a range of willingness to pay for health when taking the combined parameter uncertainty into account. The enhanced strategy becomes optimal if the willingness to pay exceeds USD 120 per additional patient with TB that is identified. If willingness to pay exceeds about 238 USD per TB case identified,<sup>32</sup> the active contact investigation has the highest probability of being cost-effective of the three alternatives (Figure 3).

1  
2  
3  
4  
5 One-way sensitivity analyses were conducted to explore the impact of uncertainties in single  
6 model parameters. These are represented in a tornado diagram in the decreasing order of the  
7 parameters' potential influence on the ICER (Figure 4). As the passive contact investigation is  
8 standard we plotted the tornado diagram for enhanced vs active contact investigation strategies.  
9  
10 Cost and effect parameters were varied over a predetermined range (Table 1). The ICER was  
11 most sensitive to the probability of identifying a patient through active case finding, and ranged  
12 between some 150 and 600 USD per case detected when probabilities were varied between 0.62  
13 and 0.41, respectively.  
14  
15  
16  
17  
18  
19  
20  
21  
22  
23  
24  
25  
26  
27

## 28 **Discussion**

29  
30 The enhanced contact investigation strategy, in combination with the passive system, was 3.8  
31 times more likely to identify patients with TB amongst household contacts than the passive  
32 contact investigation alone. The addition of household visits further improved case detection and  
33 may be necessary if we are to achieve the End TB strategy goals.<sup>33</sup> Unsurprisingly, both the  
34 enhanced and active strategies require more resources than the existing passive scheme, and the  
35 additional benefits must therefore be weighed against their additional costs, but increased  
36 performance and output requires more funding for impactful interventions.<sup>34</sup>  
37  
38  
39  
40  
41  
42  
43  
44  
45  
46  
47  
48  
49

50 Studies and systematic reviews have documented that enhanced or active household contact  
51 investigation has been able to find more people with TB compared to passive case  
52 finding.<sup>24,25,35,22</sup> These studies further conclude that improved case detection is cost-effective  
53  
54  
55  
56  
57  
58  
59  
60

1  
2  
3 compared to the passive approach. Contact investigation can be conducted in a myriad of ways  
4 and using different algorithms and approaches.<sup>17</sup> Many programs opt for a more passive  
5 approach due to the ease of implementation and lower costs. However, there have been no  
6 studies we could identify that have compared different modalities of contact investigation to each  
7 other. The current WHO guidelines identify that comparisons of different types of contact  
8 investigation is a current knowledge gap and our findings aid this void and should be followed  
9 by additional studies with costing analyses.  
10  
11  
12  
13  
14  
15  
16  
17  
18  
19  
20

21 In low-burden countries, contact investigation is a requirement for a TB program to be  
22 effective.<sup>36</sup> According to the US Centers for Disease Control and Prevention, it played an  
23 essential role in decreasing TB incidence by 44% in the USA.<sup>37</sup> A meta-analysis suggests that TB  
24 contact investigation should be considered to improve early TB case detection and decrease  
25 transmission in high-incidence areas as well.<sup>13</sup> However, in low- and middle-income countries,  
26 contact investigation has been viewed as expensive and, therefore, a low-priority. Programs do  
27 not undertake TB contact investigation as they have limited human resources. This project added  
28 health workers to support phone calls, counselling, and home visits, which led to an increase in  
29 costs. However, these are necessary costs if we are to reach all people with TB. With contact  
30 investigation, people with TB are diagnosed early and initiated on treatment, which benefits the  
31 broader community by reducing continuing transmission.<sup>38</sup> These benefits of future TB cases  
32 prevented over time are not captured by the current analytical model, and in this regard our  
33 results can be considered to be conservative. If contact investigation interventions result in  
34 earlier detection of household contacts with active TB, this program would reduce the spread of  
35 TB in the community even more effectively and be even more cost-effectively.  
36  
37  
38  
39  
40  
41  
42  
43  
44  
45  
46  
47  
48  
49  
50  
51  
52  
53  
54  
55  
56  
57  
58  
59  
60

1  
2  
3 Our study is subject to limitations. We initiated the enhanced intervention if the family did not  
4 come to the clinic for evaluation within one week of a TB patient diagnosed and initiated on  
5 treatment. The passive system, if given more time than one week may potentially have had a  
6 larger yield. However, the historical data shows that the number of people identified by the  
7 passive system during the implementation phase was similar to what we estimated in the baseline  
8 survey. Secondly, we only consider people with TB detected and did not consider outcomes of  
9 subsequent treatment in this analytical model. But in the larger project, in which this study was  
10 embedded, 98% of children diagnosed with TB were started on treatment and had over 94%  
11 treatment success rate.<sup>26, 39</sup> Thirdly, out-of-pocket expenditures for patients was not considered.  
12 Costs such as transportation to the health facilities for evaluation, cost of diagnostic tests and loss  
13 of work time may be potential barriers for the majority of the TB affected families coming to the  
14 health facilities for evaluation. Arrangements for transportation of contacts to health facilities for  
15 diagnostic tests and transportation of sputum specimens for examination should be included in  
16 the national policy to increase the detection of TB patients. Future research may consider to  
17 conduct similar costing studies in the urban areas as the cost may be different than the rural  
18 setting in which our study was based and to integrate data on the overall economic burden to  
19 households that can be averted with an active TB contact investigation program. Lastly, the study  
20 was conducted at only one center, and other health facilities with different levels of pre-existing  
21 capacity and infrastructure may yield different cost-estimates.

22  
23  
24  
25  
26  
27  
28  
29  
30  
31  
32  
33  
34  
35  
36  
37  
38  
39  
40  
41  
42  
43  
44  
45  
46  
47  
48  
49 An important strength of the study is that it was performed alongside implementation in district  
50 tuberculosis clinics in a high-prevalence setting. Data were therefore collected prospectively in a  
51 programmatic setting. A robust monitoring and evaluation system was put in place, and the  
52  
53  
54  
55  
56  
57  
58  
59  
60

1  
2  
3 District TB Control officers verified all notifications as would have been done in routine scale  
4  
5 up.  
6  
7  
8  
9  
10

## 11 **Conclusion**

12  
13 Our results show that active approaches to contact investigation identify more people with TB  
14 amongst household contacts at a relatively modest cost addressing an identified global  
15 knowledge gap. These strategies can be added to passive contact investigation approaches in a  
16 high burden setting to find the missing TB patients and meet the End TB strategy goals.  
17  
18  
19  
20  
21  
22  
23  
24  
25  
26  
27  
28  
29  
30  
31  
32  
33  
34  
35  
36  
37  
38  
39  
40  
41  
42  
43  
44  
45  
46  
47  
48  
49  
50  
51  
52  
53  
54  
55  
56  
57  
58  
59  
60

1  
2  
3  
4  
5 Figure 1: Household contacts evaluated and diagnosed for TB by passive, enhanced and active  
6 contact investigation interventions.  
7  
8  
9

10  
11  
12  
13 Figure 2: Decision tree for household contacts evaluated for TB by passive, enhanced and active  
14 contact investigation interventions.  
15  
16  
17

18  
19  
20 Figure 3: Cost-effectiveness acceptability curves for passive, enhanced and active contact  
21 investigation interventions for a range of willingness to pay per household screened.  
22  
23  
24

25  
26  
27 Figure 4: One-way sensitivity analyses for the ICERs of enhanced contact investigation  
28 compared to active contact investigation.  
29  
30  
31



1  
2  
3  
4  
5 **Author Contributions:** Conception: HH, AAM, FA Data collection: HH, AAM, SS, and FJA.

6  
7 Analysis: HH, AAM and BR Writing: HH, AAM, JFA, SS, FA, JC, TT, BR  
8  
9  
10  
11

12 **Funding:** Active case finding from October 2014 to March 2016 was supported through Stop TB  
13 Partnership's TB REACH initiative. TB REACH is generously supported by Global Affairs  
14 Canada. Active case finding from October 2016 to March 2018 was supported through The  
15 Global Fund. Award/Grant number is not applicable.  
16  
17  
18  
19  
20  
21  
22  
23

24 **Competing Interests:** None declared  
25  
26

27 **Patient consent for publication:** Not required.  
28  
29

30 **Ethics approval:** This study was approved by the Institutional Review Board (IRB) of  
31 Interactive Research and Development (IRD), OHRP Registration No. 00005148.  
32  
33  
34

35 **Data sharing statement:** No data are available. Costing data were collected by the research  
36 team which are confidential.  
37  
38  
39

40 **Patient and public involvement statement:** No patient involved  
41  
42  
43  
44  
45  
46  
47  
48  
49  
50  
51  
52  
53  
54  
55  
56  
57  
58  
59  
60

## References

---

- 1 The World Health Organization. Global tuberculosis report 2019. Geneva: World Health Organization; 2019.
- 2 World Health Organization. Global tuberculosis report 2020. Geneva, World Health Organization; 2020.
- 3 The Global Fund. Tuberculosis 2018. Accessed on Nov 15, 2020 at <https://www.theglobalfund.org/en/tuberculosis/>
- 4 Vyas A, Creswell J, Codlin AJ, Stevens R, Rao VG, Kumar B, Khaparde S, Sahu S. Community-based active case-finding to reach the most vulnerable: tuberculosis in tribal areas of India. *Int J Tuberc Lung Dis*. 2019 Jun 1;23(6):750-755.
- 5 Claassens MM, Jacobs E, Cyster E, Jennings K, James A, Dunbar R, Enarson DA, Borgdorff MW, Beyers N. Tuberculosis cases missed in primary health care facilities: should we redefine case finding? *Int J Tuberc Lung Dis*. 2013 May;17(5):608-14.
- 6 MacPherson, Peter, Houben, Rein MGJ, Glynn, Judith R, Corbett, Elizabeth L & Kranzer, Katharina. (2014). Pre-treatment loss to follow-up in tuberculosis patients in low- and lower-middle-income countries and high-burden countries: a systematic review and meta-analysis. *Bulletin of the World Health Organization*, 92 (2), 126 - 138.
- 7 Davies P. The natural history of tuberculosis in children. A study of child contacts in the Brompton Hospital Child Contact Clinic from 1930 to 1952. *Tubercle* 1961;42 (Suppl):1-40
- 8 Starke JR, Jacobs RF, Jereb J. Resurgence of tuberculosis in children. *The Journal of pediatrics* 1992;120:839-855
- 9 Bloom BR, Murray CJ. Tuberculosis: commentary on a reemergent killer. *Science* 1992;257:1055-1064
- 10 Vynnycky E, Fine PE. Lifetime risks, incubation period, and serial interval of tuberculosis. *American journal of epidemiology* 2000;152:247-263
- 11 Devadatta S, Dawson J, Fox W, et al. Attack rate of tuberculosis in a 5-year period among close family contacts of tuberculous patients under domiciliary treatment with isoniazid plus PAS or isoniazid alone. *Bulletin of the World Health Organization* 1970; 42(3): 337–351

- 1  
2  
3
- 
- 4 <sup>12</sup> Schaaf HS, Gie RP, Kennedy M, Beyers N, Hesselning PB, Donald PR. Evaluation of young  
5 children in contact with adult multidrug-resistant pulmonary tuberculosis: a 30-month follow-up.  
6 *Pediatrics* 2002;109:765-771  
7
- 8  
9 <sup>13</sup> World Health Organization. Recommendations for investigating contacts of persons with  
10 infectious tuberculosis in low- and middle-income countries. Geneva, Switzerland: World Health  
11 Organization; 2012.  
12
- 13 <sup>14</sup> Morrison J, Pai M, Hopewell PC. Tuberculosis and latent tuberculosis infection in close  
14 contacts of people with pulmonary tuberculosis in low-income and middle-income countries: a  
15 systematic review and meta-analysis. *The Lancet Infectious diseases*. 2008 Jun;8(6):359-68  
16  
17
- 18 <sup>15</sup> Fox GJ, Barry SE, Britton WJ, Marks GB: Contact investigation for tuberculosis: a systematic  
19 review and meta-analysis. *Eur Respir J* 2013, 41:134–150  
20
- 21 <sup>16</sup> Fox GJ, Nhung NV, Sy DN, Britton WJ, Marks GB. Household contact investigation for  
22 tuberculosis in Vietnam: study protocol for a cluster randomized controlled  
23 trial. *Trials*. 2013;14:342  
24  
25
- 26 <sup>17</sup> Blok L, Sahu S, Creswell J, Alba S, Stevens R, Bakker MI. (2015) Comparative Meta-  
27 Analysis of Tuberculosis Contact Investigation Interventions in Eleven High Burden Countries.  
28 *PLOS ONE* 2015;10:e0119822.  
29
- 30  
31 <sup>18</sup> World Health Organization. Recommendations for investigating contacts of persons with  
32 infectious tuberculosis in low- and middle-income countries. Geneva: World Health  
33 Organization 2012.  
34
- 35 <sup>19</sup> World Health Organization. Systematic Screening for Active Tuberculosis: Principles and  
36 Recommendations. Geneva: World Health Organization 2013.  
37  
38
- 39 <sup>20</sup> Hwang TJ, Ottmani S, Uplekar M. A rapid assessment of prevailing policies on tuberculosis  
40 contact investigation. *The International Journal of Tuberculosis and Lung Disease* 2011;15:1620  
41 3  
42
- 43 <sup>21</sup> Shah SA, Qayyum S, Abro R, Baig S, Creswell J. Active contact investigation and treatment  
44 support: an integrated approach in rural and urban Sindh, Pakistan. *Int J Tuberc Lung Dis*. 2013  
45 Dec;17(12):1569-74.  
46  
47
- 48 <sup>22</sup> Fox GJ, Nhung NV, Sy DN, et al. Household-contact investigation for detection of  
49 Tuberculosis in Vietnam. *New England Journal of Medicine* 2018;378:221-9  
50
- 51 <sup>23</sup> Tesfaye L, Lemu YK, Tareke KG, Chaka M, Feyissa GT. Exploration of barriers and  
52 facilitators to household contact tracing of index tuberculosis cases in Anlemo district, Hadiya  
53 zone, Southern Ethiopia: Qualitative study. *PLOS ONE* 2020;15:e0233358  
54  
55  
56  
57  
58  
59  
60

- 1  
2  
3  
4  
5  
6  
7  
8  
9  
10  
11  
12  
13  
14  
15  
16  
17  
18  
19  
20  
21  
22  
23  
24  
25  
26  
27  
28  
29  
30  
31  
32  
33  
34  
35  
36  
37  
38  
39  
40  
41  
42  
43  
44  
45  
46  
47  
48  
49  
50  
51  
52  
53  
54  
55  
56  
57  
58  
59  
60
- 
- <sup>24</sup> Atif M, Sulaiman SAS, Shafie AA, Ali I, Asif M. Tracing contacts of TB patients in Malaysia: costs and practicality. SpringerPlus 2012;1:40
- <sup>25</sup> Shah L, Rojas M, Mori O, Zamudio C, Kaufman JS, Otero L, Gotuzzo E, Seas C, Brewer TF. Cost-effectiveness of active case finding of household contacts of pulmonary tuberculosis patients in a low HIV, tuberculosis-endemic urban area of Lima, Peru. *Epidemiol Infect.* 2017 Apr;145(6):1107-1117.
- <sup>26</sup> Malik AA, Amanullah F, Codlin AJ, Siddiqui S, Jaswal M, Ahmed JF, Saleem S, Khurshid A, Hussain H. Improving childhood tuberculosis detection and treatment through facility-based screening in rural Pakistan. *Int J Tuberc Lung Dis.* 2018 Aug 1; 22(8): 851–857.
- <sup>27</sup> Waters H, Abdallah H, Santillan D. Application of activity-based costing (ABC) for a Peruvian NGO healthcare provider. *Int J Health Plann Manage* 2001;16:3-18.
- <sup>28</sup> Hussain H, Waters H, Omer SB, et al. The cost of treatment for child pneumonias and meningitis in the Northern Areas of Pakistan. *Int J Health Plann Manage* 2006;21:229-38
- <sup>29</sup> Bergmo TS. How to Measure Costs and Benefits of eHealth Interventions: An Overview of Methods and Frameworks. *J Med Internet Res.* 2015 Nov 9;17(11):e254.
- <sup>30</sup> Drummond M, Sculpher M, Torrance G, O'Brien B, Stoddart GI. *Methods for the Economic Evaluation of Health Care Programmes.* 3rd edition. Oxford, UK: Oxford University Press; 2005.
- <sup>31</sup> Gray AM, Clarke PM, Wolstenholme JL, Wordsworth S. *Applied methods of cost-effectiveness analysis in healthcare.* United States: Oxford University Press; 2010.
- <sup>32</sup> Shillcutt SD, Walker DG, Goodman CA, Mills AJ: Cost-Effectiveness in Low- and Middle-Income Countries: A Review of the Debates Surrounding Decision Rules. *Pharmacoeconomics* 2009, 27:903–917
- <sup>33</sup> The World Health Organization. *The End TB Strategy, Global strategy and targets for tuberculosis prevention, care and control after 2015.* World Health Organization 2018.
- <sup>34</sup> Stop TB Partnership. *UN high-level meeting on TB key targets & commitments for 2022.* Geneva, Switzerland: Stop TB Partnership; 2018
- <sup>35</sup> Htet KK, Liabsuetrakul T, Thein S. Cost-effectiveness of a new strategy to detect pulmonary tuberculosis in household contacts in Myanmar. *Int J Tuberc Lung Dis.* 2017 Feb 1;21(2):181-187.
- <sup>36</sup> Joint Tuberculosis Committee Of The British Thoracic S. Control and prevention of tuberculosis in the United Kingdom: Code of Practice 2000. *Thorax* 2000;55:887-901.

1  
2  
3  
4  
5  
6  
7  
8  
9  
10  
11  
12  
13  
14  
15  
16  
17  
18  
19  
20  
21  
22  
23  
24  
25  
26  
27  
28  
29  
30  
31  
32  
33  
34  
35  
36  
37  
38  
39  
40  
41  
42  
43  
44  
45  
46  
47  
48  
49  
50  
51  
52  
53  
54  
55  
56  
57  
58  
59  
60

---

<sup>37</sup> Taylor Z, Nolan CM, Blumberg HM, American Thoracic Society, Centers for Disease Control and Prevention, Infectious Diseases Society of America. Controlling tuberculosis in the United States Recommendations from the American Thoracic Society, CDC, and the Infectious Diseases Society of America. *MMWR Recomm Rep.* 2005 Nov 4; 54 (RR-12) :1-81

<sup>38</sup> Dowdy DW, Basu S, Andrews JR. Is passive diagnosis enough? The impact of subclinical disease on diagnostic strategies for tuberculosis. *Am J Respir Crit Care Med* 2013; 187: 543-51

<sup>39</sup> High yields from contact investigation of child index TB patients. Malik A. A, Amanullah F, Jaswal M, Siddiqui S, Ahmed, J. F, Creswell J, Hussain H. *Int J Tuberc Lung Dis.* 24(8):850–852

**Figure 1: Household contacts evaluated and diagnosed for TB by passive, enhanced and active contact investigation interventions.**

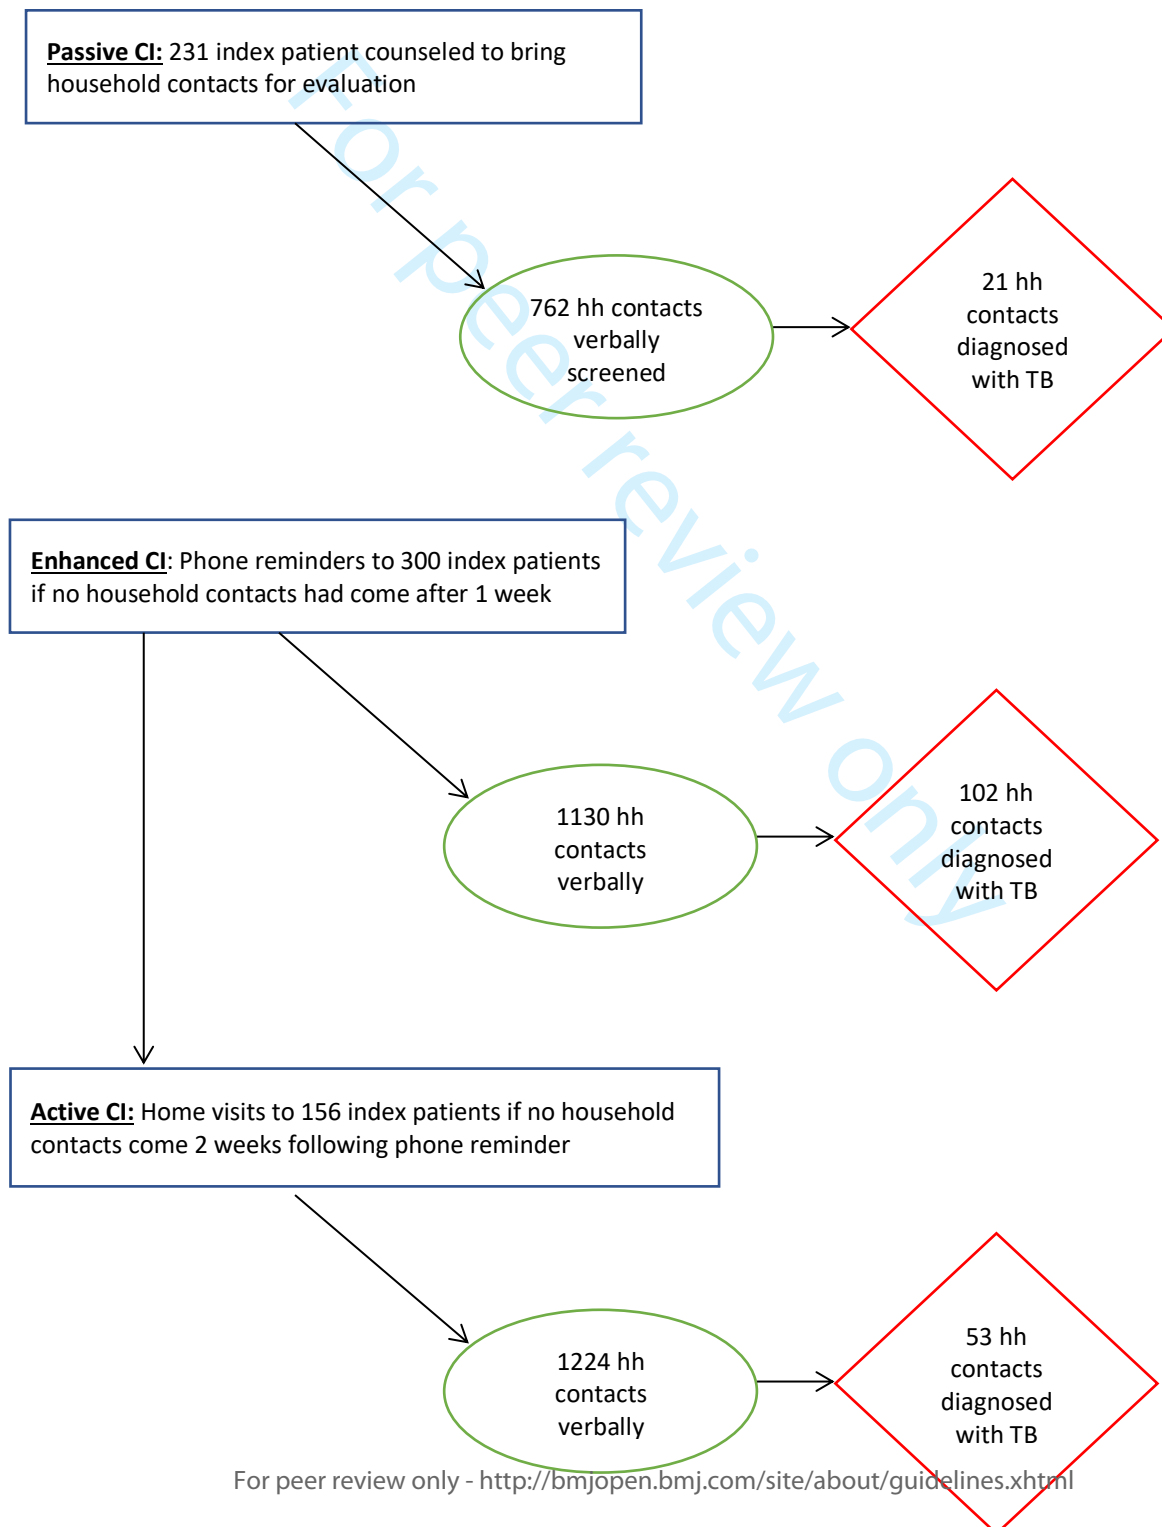

Figure 2: Decision tree for household contacts evaluated for TB by passive, enhanced and active contact investigation interventions.

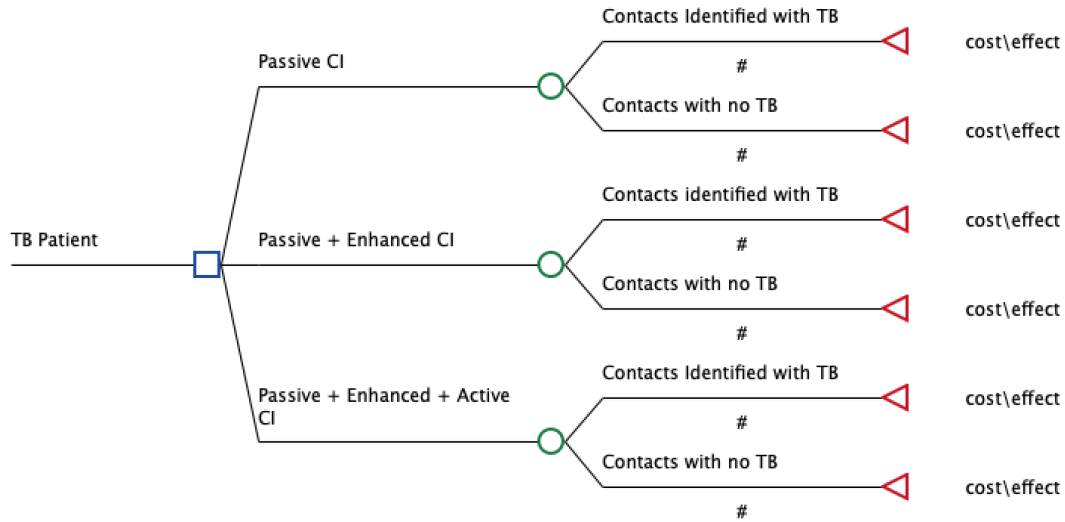

view only

Figure 3: Cost-effectiveness acceptability curves for passive, enhanced and active contact investigation interventions for a range of willingness to pay per household screened.

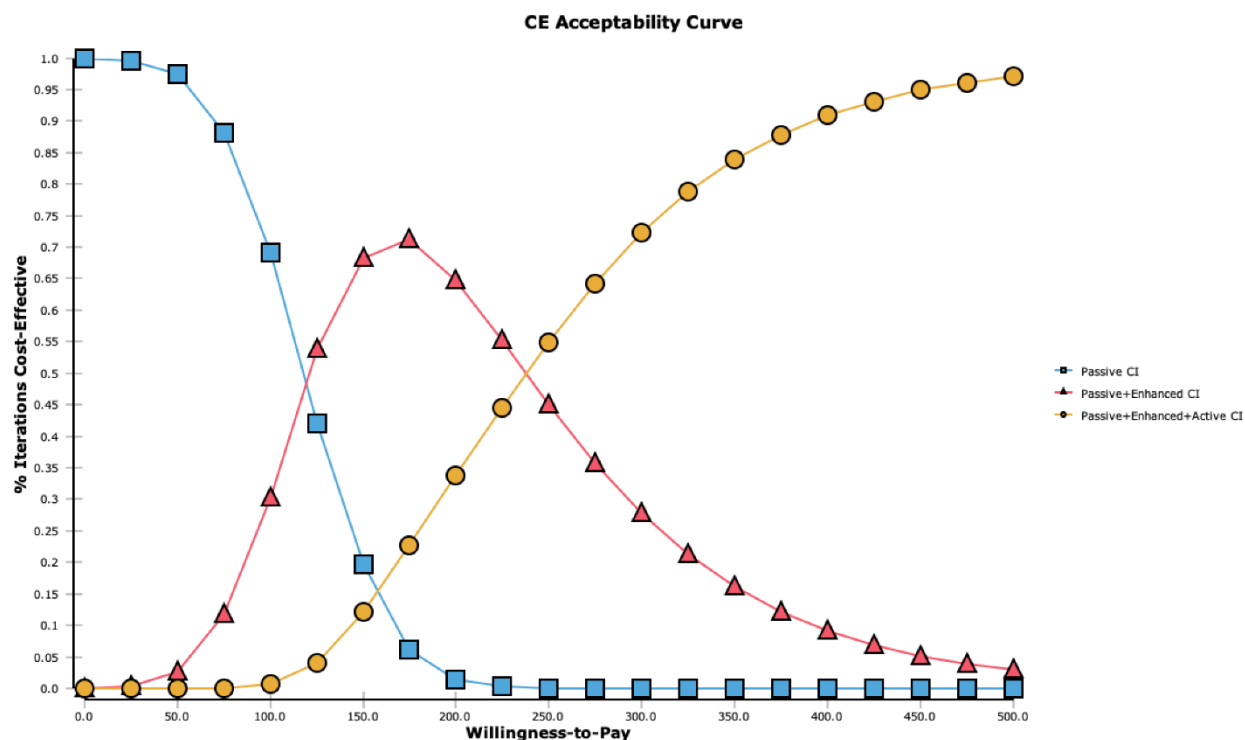



**Figure 4: One-way sensitivity analyses for the ICERs of enhanced contact investigation compared to active contact investigation.\***

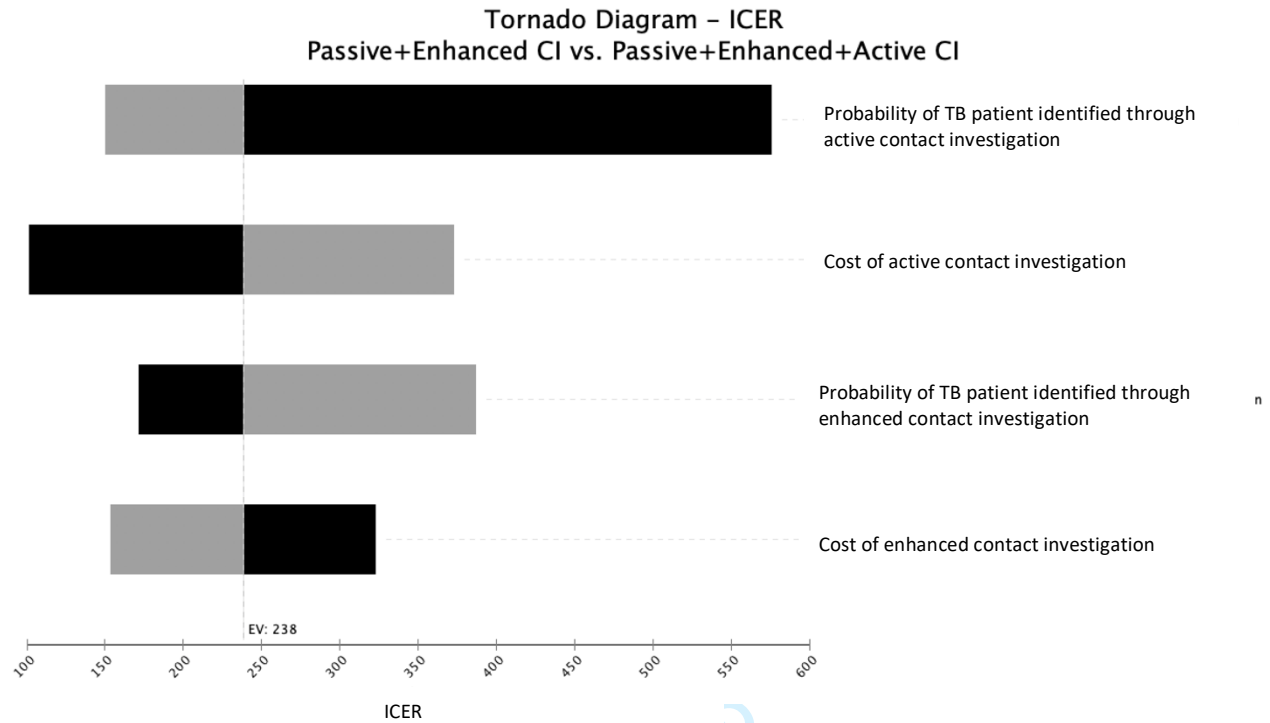

\*The black bar denoted the lower part of the parameter range and the red bar shows the higher part of the parameter range. If red bar is on the grey of the expected value (EV) it means that the ICER will increase when the parameter value increase. When the red bar is on the left then the ICER will decrease with the increase in parameter value.

# Reporting checklist for economic evaluation of health interventions.

Based on the CHEERS guidelines.

## Instructions to authors

Complete this checklist by entering the page numbers from your manuscript where readers will find each of the items listed below.

Your article may not currently address all the items on the checklist. Please modify your text to include the missing information. If you are certain that an item does not apply, please write "n/a" and provide a short explanation.

Upload your completed checklist as an extra file when you submit to a journal.

In your methods section, say that you used the CHEERS reporting guidelines, and cite them as:

Husereau D, Drummond M, Petrou S, Carswell C, Moher D, Greenberg D, Augustovski F, Briggs AH, Mauskopf J, Loder E. Consolidated Health Economic Evaluation Reporting Standards (CHEERS) statement.

|                           | Reporting Item                                                                                                                                                                                            | Page Number  |
|---------------------------|-----------------------------------------------------------------------------------------------------------------------------------------------------------------------------------------------------------|--------------|
| <b>Title</b>              |                                                                                                                                                                                                           |              |
|                           | <a href="#">#1</a> Identify the study as an economic evaluation or use more specific terms such as “cost-effectiveness analysis”, and describe the interventions compared.                                | Page 1       |
| <b>Abstract</b>           |                                                                                                                                                                                                           |              |
|                           | <a href="#">#2</a> Provide a structured summary of objectives, perspective, setting, methods (including study design and inputs), results (including base case and uncertainty analyses), and conclusions | Page 2 and 3 |
| <b>Introduction</b>       |                                                                                                                                                                                                           |              |
| Background and objectives | <a href="#">#3</a> Provide an explicit statement of the broader context for the study. Present the study question and its relevance for health policy or practice decisions                               | Pages 5-7    |
| <b>Methods</b>            |                                                                                                                                                                                                           |              |

|    |                         |                      |                                                                    |         |
|----|-------------------------|----------------------|--------------------------------------------------------------------|---------|
| 1  | Target population and   | <a href="#">#4</a>   | Describe characteristics of the base case population and           | Page 7  |
| 2  | subgroups               |                      | subgroups analysed, including why they were chosen.                |         |
| 3  |                         |                      |                                                                    |         |
| 4  | Setting and location    | <a href="#">#5</a>   | State relevant aspects of the system(s) in which the decision(s)   | Page 7  |
| 5  |                         |                      | need(s) to be made.                                                |         |
| 6  |                         |                      |                                                                    |         |
| 7  |                         |                      |                                                                    |         |
| 8  | Study perspective       | <a href="#">#6</a>   | Describe the perspective of the study and relate this to the costs | Page 9  |
| 9  |                         |                      | being evaluated.                                                   |         |
| 10 |                         |                      |                                                                    |         |
| 11 |                         |                      |                                                                    |         |
| 12 | Comparators             | <a href="#">#7</a>   | Describe the interventions or strategies being compared and        | Page 8  |
| 13 |                         |                      | state why they were chosen.                                        | and 9   |
| 14 |                         |                      |                                                                    |         |
| 15 |                         |                      |                                                                    |         |
| 16 | Time horizon            | <a href="#">#8</a>   | State the time horizon(s) over which costs and consequences are    | Page 8  |
| 17 |                         |                      | being evaluated and say why appropriate.                           | and 9   |
| 18 |                         |                      |                                                                    |         |
| 19 |                         |                      |                                                                    |         |
| 20 | Discount rate           | <a href="#">#9</a>   | Report the choice of discount rate(s) used for costs and           | Page 11 |
| 21 |                         |                      | outcomes and say why appropriate                                   |         |
| 22 |                         |                      |                                                                    |         |
| 23 |                         |                      |                                                                    |         |
| 24 | Choice of health        | <a href="#">#10</a>  | Describe what outcomes were used as the measure(s) of benefit      | Page 11 |
| 25 | outcomes                |                      | in the evaluation and their relevance for the type of analysis     | and 12  |
| 26 |                         |                      | performed                                                          |         |
| 27 |                         |                      |                                                                    |         |
| 28 |                         |                      |                                                                    |         |
| 29 | Measurement of          | <a href="#">#11a</a> | Single study-based estimates: Describe fully the design features   | Page 11 |
| 30 | effectiveness           |                      | of the single effectiveness study and why the single study was a   |         |
| 31 |                         |                      | sufficient source of clinical effectiveness data                   |         |
| 32 |                         |                      |                                                                    |         |
| 33 |                         |                      |                                                                    |         |
| 34 | Measurement of          | <a href="#">#11b</a> | Synthesis-based estimates: Describe fully the methods used for     |         |
| 35 | effectiveness           |                      | identification of included studies and synthesis of clinical       |         |
| 36 |                         |                      | effectiveness data                                                 |         |
| 37 |                         |                      |                                                                    |         |
| 38 |                         |                      |                                                                    |         |
| 39 |                         |                      |                                                                    |         |
| 40 | Measurement and         | <a href="#">#12</a>  | If applicable, describe the population and methods used to elicit  |         |
| 41 | valuation of preference |                      | preferences for outcomes.                                          |         |
| 42 | based outcomes          |                      |                                                                    |         |
| 43 |                         |                      |                                                                    |         |
| 44 |                         |                      |                                                                    |         |
| 45 | **Estimating resources  |                      |                                                                    |         |
| 46 |                         |                      |                                                                    |         |
| 47 | and costs **            |                      |                                                                    |         |
| 48 |                         |                      |                                                                    |         |
| 49 |                         |                      |                                                                    |         |
| 50 |                         | <a href="#">#13a</a> | Single study-based economic evaluation: Describe approaches        |         |
| 51 |                         |                      | used to estimate resource use associated with the alternative      |         |
| 52 |                         |                      | interventions. Describe primary or secondary research methods      |         |
| 53 |                         |                      | for valuing each resource item in terms of its unit cost. Describe |         |
| 54 |                         |                      | any adjustments made to approximate to opportunity costs           |         |
| 55 |                         |                      |                                                                    |         |
| 56 |                         |                      |                                                                    |         |
| 57 |                         |                      |                                                                    |         |

## Methods

|    |                       |                      |                                                                    |          |
|----|-----------------------|----------------------|--------------------------------------------------------------------|----------|
| 1  | Estimating resources  | <a href="#">#13b</a> | Model-based economic evaluation: Describe approaches and           | Pages 9, |
| 2  | and costs             |                      | data sources used to estimate resource use associated with         | 10 and   |
| 3  |                       |                      | model health states. Describe primary or secondary research        | 11       |
| 4  |                       |                      | methods for valuing each resource item in terms of its unit cost.  |          |
| 5  |                       |                      | Describe any adjustments made to approximate to opportunity        |          |
| 6  |                       |                      | costs.                                                             |          |
| 7  |                       |                      |                                                                    |          |
| 8  |                       |                      |                                                                    |          |
| 9  |                       |                      |                                                                    |          |
| 10 | Currency, price date, | <a href="#">#14</a>  | Report the dates of the estimated resource quantities and unit     | Page 11  |
| 11 | and conversion        |                      | costs. Describe methods for adjusting estimated unit costs to the  |          |
| 12 |                       |                      | year of reported costs if necessary. Describe methods for          |          |
| 13 |                       |                      | converting costs into a common currency base and the exchange      |          |
| 14 |                       |                      | rate.                                                              |          |
| 15 |                       |                      |                                                                    |          |
| 16 |                       |                      |                                                                    |          |
| 17 |                       |                      |                                                                    |          |
| 18 |                       |                      |                                                                    |          |
| 19 | Choice of model       | <a href="#">#15</a>  | Describe and give reasons for the specific type of decision        | Page 12  |
| 20 |                       |                      | analytical model used. Providing a figure to show model            |          |
| 21 |                       |                      | structure is strongly recommended.                                 |          |
| 22 |                       |                      |                                                                    |          |
| 23 |                       |                      |                                                                    |          |
| 24 | Assumptions           | <a href="#">#16</a>  | Describe all structural or other assumptions underpinning the      | Page 11  |
| 25 |                       |                      | decision-analytical model.                                         |          |
| 26 |                       |                      |                                                                    |          |
| 27 |                       |                      |                                                                    |          |
| 28 | Analytical methods    | <a href="#">#17</a>  | Describe all analytical methods supporting the evaluation. This    | Page 12  |
| 29 |                       |                      | could include methods for dealing with skewed, missing, or         |          |
| 30 |                       |                      | censored data; extrapolation methods; methods for pooling data;    |          |
| 31 |                       |                      | approaches to validate or make adjustments (such as half cycle     |          |
| 32 |                       |                      | corrections) to a model; and methods for handling population       |          |
| 33 |                       |                      | heterogeneity and uncertainty.                                     |          |
| 34 |                       |                      |                                                                    |          |
| 35 |                       |                      |                                                                    |          |
| 36 |                       |                      |                                                                    |          |
| 37 |                       |                      |                                                                    |          |
| 38 | <b>Results</b>        |                      |                                                                    |          |
| 39 |                       |                      |                                                                    |          |
| 40 | Study parameters      | <a href="#">#18</a>  | Report the values, ranges, references, and, if used, probability   | Page 13  |
| 41 |                       |                      | distributions for all parameters. Report reasons or sources for    |          |
| 42 |                       |                      | distributions used to represent uncertainty where appropriate.     |          |
| 43 |                       |                      | Providing a table to show the input values is strongly             |          |
| 44 |                       |                      | recommended.                                                       |          |
| 45 |                       |                      |                                                                    |          |
| 46 |                       |                      |                                                                    |          |
| 47 |                       |                      |                                                                    |          |
| 48 |                       |                      |                                                                    |          |
| 49 | Incremental costs and | <a href="#">#19</a>  | For each intervention, report mean values for the main             | Page 15, |
| 50 | outcomes              |                      | categories of estimated costs and outcomes of interest, as well as | 16       |
| 51 |                       |                      | mean differences between the comparator groups. If applicable,     |          |
| 52 |                       |                      | report incremental cost-effectiveness ratios.                      |          |
| 53 |                       |                      |                                                                    |          |
| 54 |                       |                      |                                                                    |          |
| 55 | Characterising        | <a href="#">#20a</a> | Single study-based economic evaluation: Describe the effects of    | Page 16, |
| 56 | uncertainty           |                      | sampling uncertainty for the estimated incremental cost and        | 17       |
| 57 |                       |                      | incremental effectiveness parameters, together with the impact     |          |
| 58 |                       |                      |                                                                    |          |
| 59 |                       |                      |                                                                    |          |
| 60 |                       |                      |                                                                    |          |

of methodological assumptions (such as discount rate, study perspective).

1  
2  
3  
4 Characterising [#20b](#) Model-based economic evaluation: Describe the effects on the Page 17  
5 uncertainty results of uncertainty for all input parameters, and uncertainty  
6 related to the structure of the model and assumptions.  
7

8  
9 Characterising [#21](#) If applicable, report differences in costs, outcomes, or cost  
10 heterogeneity effectiveness that can be explained by variations between  
11 subgroups of patients with different baseline characteristics or  
12 other observed variability in effects that are not reducible by  
13 more information.  
14  
15  
16

## 17 Discussion

18  
19  
20 Study findings, [#22](#) Summarise key study findings and describe how they support Page 17,  
21 limitations, the conclusions reached. Discuss limitations and the 18, 19  
22 generalisability, and generalisability of the findings and how the findings fit with  
23 current knowledge current knowledge.  
24  
25

## 26 Other

27  
28  
29 Source of funding [#23](#) Describe how the study was funded and the role of the funder in Page 22  
30 the identification, design, conduct, and reporting of the analysis.  
31 Describe other non-monetary sources of support  
32  
33

34 Conflict of interest [#24](#) Describe any potential for conflict of interest of study Page 22  
35 contributors in accordance with journal policy. In the absence of  
36 a journal policy, we recommend authors comply with  
37 International Committee of Medical Journal Editors  
38 recommendations  
39  
40  
41  
42

43 None The CHEERS checklist is distributed under the terms of the Creative Commons Attribution License CC-  
44 BY-NC. This checklist can be completed online using <https://www.goodreports.org/>, a tool made by the  
45 [EQUATOR Network](#) in collaboration with [Penelope.ai](#)  
46  
47  
48  
49  
50  
51  
52  
53  
54  
55  
56  
57  
58  
59  
60

# BMJ Open

## Cost-effectiveness of household contact investigation for detection of tuberculosis in Pakistan

|                                 |                                                                                                                                                                                                                                                                                                                                                                                                                                                                                                                                                                                                                                                                                                                                                                                                                                                                               |
|---------------------------------|-------------------------------------------------------------------------------------------------------------------------------------------------------------------------------------------------------------------------------------------------------------------------------------------------------------------------------------------------------------------------------------------------------------------------------------------------------------------------------------------------------------------------------------------------------------------------------------------------------------------------------------------------------------------------------------------------------------------------------------------------------------------------------------------------------------------------------------------------------------------------------|
| Journal:                        | <i>BMJ Open</i>                                                                                                                                                                                                                                                                                                                                                                                                                                                                                                                                                                                                                                                                                                                                                                                                                                                               |
| Manuscript ID                   | bmjopen-2021-049658.R1                                                                                                                                                                                                                                                                                                                                                                                                                                                                                                                                                                                                                                                                                                                                                                                                                                                        |
| Article Type:                   | Original research                                                                                                                                                                                                                                                                                                                                                                                                                                                                                                                                                                                                                                                                                                                                                                                                                                                             |
| Date Submitted by the Author:   | 22-Aug-2021                                                                                                                                                                                                                                                                                                                                                                                                                                                                                                                                                                                                                                                                                                                                                                                                                                                                   |
| Complete List of Authors:       | Hussain, Hamidah; Universitetet i Bergen, Centre for International Health, Department of Global Public Health and Primary Care; Interactive Research and Development (IRD) Global<br>Malik, Aryn ; Interactive Research and Development (IRD) Global<br>Ahmed, Junaid; Indus Health Network, Global Health Directorate<br>Siddiqui, Sara; Indus Health Network, Global Health Directorate<br>Amanullah, Farhana; The Indus Hospital<br>Creswell, Jacob; Stop TB Partnership<br>Tylleskär, Thorkild; Universitetet i Bergen, Centre for International Health, Department of Global Public Health and Primary Care<br>Robberstad, Bjarne; Universitetet i Bergen, Centre for International Health, Department of Global Public Health and Primary Care;<br>Universitetet i Bergen, Section for Ethics and Health Economics, Department of Global Public Health and Primary Care |
| <b>Primary Subject Heading</b>: | Health economics                                                                                                                                                                                                                                                                                                                                                                                                                                                                                                                                                                                                                                                                                                                                                                                                                                                              |
| Secondary Subject Heading:      | Health policy, Infectious diseases, Global health, Epidemiology                                                                                                                                                                                                                                                                                                                                                                                                                                                                                                                                                                                                                                                                                                                                                                                                               |
| Keywords:                       | Tuberculosis < INFECTIOUS DISEASES, HEALTH ECONOMICS, Health policy < HEALTH SERVICES ADMINISTRATION & MANAGEMENT                                                                                                                                                                                                                                                                                                                                                                                                                                                                                                                                                                                                                                                                                                                                                             |
|                                 |                                                                                                                                                                                                                                                                                                                                                                                                                                                                                                                                                                                                                                                                                                                                                                                                                                                                               |

SCHOLARONE™  
Manuscripts



I, the Submitting Author has the right to grant and does grant on behalf of all authors of the Work (as defined in the below author licence), an exclusive licence and/or a non-exclusive licence for contributions from authors who are: i) UK Crown employees; ii) where BMJ has agreed a CC-BY licence shall apply, and/or iii) in accordance with the terms applicable for US Federal Government officers or employees acting as part of their official duties; on a worldwide, perpetual, irrevocable, royalty-free basis to BMJ Publishing Group Ltd ("BMJ") its licensees and where the relevant Journal is co-owned by BMJ to the co-owners of the Journal, to publish the Work in this journal and any other BMJ products and to exploit all rights, as set out in our [licence](#).

The Submitting Author accepts and understands that any supply made under these terms is made by BMJ to the Submitting Author unless you are acting as an employee on behalf of your employer or a postgraduate student of an affiliated institution which is paying any applicable article publishing charge ("APC") for Open Access articles. Where the Submitting Author wishes to make the Work available on an Open Access basis (and intends to pay the relevant APC), the terms of reuse of such Open Access shall be governed by a Creative Commons licence – details of these licences and which [Creative Commons](#) licence will apply to this Work are set out in our licence referred to above.

Other than as permitted in any relevant BMJ Author's Self Archiving Policies, I confirm this Work has not been accepted for publication elsewhere, is not being considered for publication elsewhere and does not duplicate material already published. I confirm all authors consent to publication of this Work and authorise the granting of this licence.

# Cost-effectiveness of household contact investigation for detection of tuberculosis in Pakistan

## Corresponding author:

### Hamidah Hussain

Interactive Research and Development (IRD) Global,  
Centre for International Health, Department of Global Public Health and Primary Care,  
University of Bergen, Norway  
583 Orchard Road, #06-01 Forum, Singapore 238884, Singapore;  
[Hamidah.hussain@ird.global](mailto:Hamidah.hussain@ird.global)  
Tel: +1 647 574 7918

### Amy A. Malik

Interactive Research and Development (IRD) Global, Singapore 238884, Singapore;  
Global Health Directorate, Indus Health Network, Karachi 75190, Pakistan

### Junaid F. Ahmed

Global Health Directorate, Indus Health Network, Karachi 75190, Pakistan

### Sara Siddiqui

Global Health Directorate, Indus Health Network, Karachi 75190, Pakistan

### Farhana Amanullah

The Indus Hospital, Karachi 75190, Pakistan

### Jacob Creswell

Stop TB Partnership, Geneva, 1218, Switzerland

### Thorkild Tylleskär

Centre for International Health, Department of Global Public Health and Primary Care,  
University of Bergen, Norway

### Bjarne Robberstad

Centre for International Health, Department of Global Public Health and Primary Care,  
University of Bergen, Norway  
Section for Ethics and Health Economics, Department of Global Public Health and Primary Care,  
University of Bergen, Norway

**Word Count: 3760**

**Key words:** Passive contact investigation, Enhanced contact investigation, Active contact investigation, Cost effectiveness analysis



## Abstract

### Objectives

Despite WHO guidelines recommending household contact investigation, and studies showing the impact of active screening, most TB programs in resource-limited settings only carry out passive contact investigation. The cost of such strategies are often cited as barriers to their implementation. However, little data is available for the additional costs required to implement this strategy. We aimed to estimate the cost and cost-effectiveness of active contact investigation as compared to passive contact investigation in urban Pakistan

### Methods:

We estimated the cost-effectiveness of ‘enhanced’ (passive with follow-up) and ‘active’ (household visit) contact investigations compared to standard ‘passive’ contact investigation from providers and the program’s perspective using a simple decision tree. Costs were collected in Pakistan from a TB clinic performing passive contact investigation and from studies of active contact tracing interventions conducted. The effectiveness was based on the number of TB patients identified among household contacts screened.

### Results

The addition of enhanced contact investigation to the existing passive mode detected 3.7 times more cases of TB per index patient compared to passive contact investigation alone. The

1  
2  
3 incremental cost was USD 30 per index patient, which yielded an incremental cost of USD 120  
4  
5 per incremental patient identified with TB. The active contact investigation was 1.5 times more  
6  
7 effective than enhanced contact investigation with an incremental cost of USD 238 per  
8  
9 incremental TB patient identified.  
10  
11  
12  
13  
14  
15  
16  
17

## 18 **Conclusion**

19  
20 Our results show that enhanced and active approaches to contact investigation effectively  
21  
22 identify additional patients with TB amongst household contacts at a relatively modest cost.  
23  
24

25 These strategies can be added to the passive contact investigation in a high burden setting to find  
26  
27 the people with TB who are missed and meet the End TB strategy goals.  
28  
29  
30  
31  
32  
33  
34  
35  
36  
37  
38  
39  
40  
41  
42  
43  
44  
45  
46  
47  
48  
49  
50  
51  
52  
53  
54  
55  
56  
57  
58  
59  
60

**Strengths and limitations of this study:**

- The study was conducted in programmatic conditions in a high-prevalence setting.
- The study compares cost effectiveness of three contact investigation approaches from health system perspective in a sequential approach.
- The data for the passive approach comes from previous years and we were unable to account for any time trend.
- The study did not consider out-of-pocket expenditures for patients which underestimates the overall costs.

## Background

Tuberculosis (TB) remains a leading cause of morbidity and mortality, especially in low- and middle-income countries. According to the latest estimates, 10 million people fell ill with TB in 2019, though only 7.1 million were reported to national programmes. Eight countries account for two-thirds of the reported TB burden in the world: India (26%), Indonesia (8.5%), China (8.4%), the Philippines (6%), Pakistan (5.7%), Nigeria (4.4%), Bangladesh (3.6%) and South Africa (3.6%).<sup>1,2,3</sup> Reasons for the gap between estimated and notified individuals with TB include limited access to health care, poor diagnosis capacity for people who do access care, as well as underreporting of people diagnosed.<sup>4,5,6</sup>

Undiagnosed people with TB continue to transmit TB to others. The risk of transmission is particularly high amongst members of households living with people with undiagnosed pulmonary TB. Studies have documented an infection rate of 30-50% amongst household contacts of infectious adults, with the infection rate in children under 5 being as high as 72%.<sup>7,8</sup> Of those infected with TB, 10-20% develop the disease over their lifetimes, and this number is even higher for people who are immunocompromised, for example when they are co-infected with HIV.<sup>9,10,11,12</sup>

Household contact investigation is recommended as a means to address these challenges.<sup>13,14</sup> In the light of the high infection rates, household contact investigation is a critical activity for TB programs for two reasons. First, it allows early identification of additional household members who have TB disease and require immediate treatment, stopping transmission. Second, it allows programs to identify people who can benefit from the treatment of TB infection (TBI) to prevent

1  
2  
3 disease progression, importantly children and people living with HIV. A meta-analysis of contact  
4 investigation showed that 3.1% of contacts in low-resource settings and 1.4% of contacts in high-  
5 resource settings have TB disease, making this a potential high yield strategy to find people with  
6 TB.<sup>15,16</sup> A large proportion of childhood TB can be identified through contact investigation,  
7 which is of particular value since global rates of detection among children are much lower than  
8 for adults.<sup>1</sup>

9  
10  
11  
12  
13  
14  
15  
16  
17  
18  
19 Household contact investigation can be carried out in many different ways along a continuum of  
20 passive and active approaches.<sup>17</sup> In passive contact tracing, the index patient is asked to bring in  
21 their family members for screening to the facility, while in active contact tracing, health care  
22 workers visit the index patient's home. Between the active and passive modes, lies the  
23 "enhanced" form of contact tracing, in which health workers make reminder phone calls and  
24 follow up with the family and encourages them to come to the facility for screening can also be  
25 delivered.

26  
27  
28  
29  
30  
31  
32  
33  
34  
35  
36  
37 Despite WHO guidelines recommending household contact investigation<sup>18,19</sup> and studies  
38 documenting the outcomes of active approaches the most TB programs in resource-limited  
39 settings only carry out passive contact investigation and even then, implementation is limited.<sup>20,21</sup>  
40 A cluster-randomized controlled trial demonstrated that contact investigation plus passive case  
41 finding (PCF) was beneficial compared to passive case finding alone.<sup>22</sup> The cost of active contact  
42 investigation, including additional efforts required by already stretched health care providers, has  
43 often been cited as a barrier to its implementation.<sup>23</sup> However, little data is available for the  
44 additional cost of implementing active contact investigation, and especially so when

1  
2  
3 implemented under routine program conditions. A study from Malaysia reported the cost of  
4 active contact investigation to be USD 6.60 per a single contact tracing visit with a yield of  
5 0.5%.<sup>24</sup> In Peru, adding active contact tracing to PCF incurred an incremental cost of USD 48.8  
6 to evaluate household contacts of an index TB patient, with an incremental cost-effectiveness  
7 ratio (ICER) of USD 1811 per DALY averted.<sup>25</sup> We were not able to identify studies reporting  
8 costs or cost-effectiveness for the enhanced mode of contact tracing.  
9  
10  
11  
12  
13  
14  
15  
16  
17  
18

19 The objective of this study was to estimate the cost and cost-effectiveness of the enhanced and  
20 active contact tracing interventions in a high-burden programmatic setting, compared to the  
21 existing passive approach.  
22  
23  
24  
25  
26  
27  
28  
29

## 30 **Methods**

### 31 **SETTING**

32  
33 The costing study was a subset of a larger study where an active case finding intervention was  
34 implemented for children with TB. The study was conducted at four TB treatment and reporting  
35 centres in Kotri, a rural town in Sindh, Pakistan. All children presenting to these facilities were  
36 verbally screened for symptoms of TB and those considered to be at high risk of having TB were  
37 further investigated. Children diagnosed with TB were started on treatment, and we conducted  
38 contact investigation for their household contacts.<sup>26</sup> The household contact investigation reported  
39 here was carried out at one of the four centers (Institute of Chest Disease Hospital) from April  
40 2015 to March 2016.  
41  
42  
43  
44  
45  
46  
47  
48  
49  
50  
51  
52  
53  
54  
55  
56  
57  
58  
59  
60

## INTERVENTIONS

For the study, the index patient was the first person identified with TB in the family, while household contacts were defined as people living in the same household as the index patient.

As part of the routine program passive contact investigation is conducted where, index patients are counselled to bring their household contacts for evaluation. Contacts who respond are evaluated for TB symptoms and risk factors. A limitation of this approach is that household contacts screened were recorded only as a TB contact and not linked directly to the index TB patient in a specific household. There is no routine follow-up to see if the specific contacts attended the facility for screening or not.

As part of the intervention we instituted enhanced contact investigation as an additional step which included follow-up with the families for contact investigation. Adults and guardians of children under 15 years of age newly diagnosed with TB were asked about the presence of TB symptoms or household members on TB treatment in their families. They were counselled to bring their enumerated household contacts for evaluation, as in the passive approach. If the enumerated household contacts did not come to the facility for assessment after one week, a reminder phone call was made, followed by second phone call after another week. If the family still had not come two weeks after the second phone reminder, active contact investigation was implemented. Active contact investigation included health workers conducting a household visit to verbally screen the family at home and to counsel the family to go to the clinic for further evaluation (Figure 1).

1  
2  
3 At the clinic, enumerated household contacts were screened by existing TB doctors in the  
4 passive system or by trained health workers for enhanced and active contact investigation. All  
5 contacts were verbally screened for symptoms of TB such as cough of more than two weeks,  
6 contact with someone other than the index patient who had TB, glandular swelling, fever lasting  
7 more than two weeks, night sweats and inappropriate weight loss. Individuals with suggestive  
8 symptoms or additional exposure were referred to the project's medical officer for further  
9 evaluation. They then received a chest x-ray and were asked to provide a sputum sample for  
10 smear microscopy. A complete blood count (CBC) and erythrocyte sedimentation rate (ESR)  
11 was done for child contacts to aid in diagnosis as indicated. Contacts diagnosed with TB were  
12 started on TB treatment in line with the National TB Program (NTP) guidelines. Children under  
13 five years of age in whom TB disease was ruled out were offered isoniazid preventive therapy  
14 (IPT) as per NTP guidelines.<sup>26</sup> All clinical evaluations and investigations were provided without  
15 any charge to the contacts.  
16  
17  
18  
19  
20  
21  
22  
23  
24  
25  
26  
27  
28  
29  
30  
31  
32  
33  
34

## 35 DATA COLLECTION

36 For the passive approach, health facility staff recorded data using a paper-based system which  
37 were then abstracted for the study. For enhanced and active contact interventions project based  
38 trained community health workers and doctors administered questions to assess TB  
39 symptoms/risks and documented results of clinical evaluation and diagnostic tests using a  
40 custom-built smart-phone based data collection application with built-in decision support  
41 developed for the project.<sup>26</sup>  
42  
43  
44  
45  
46  
47  
48  
49  
50  
51  
52

## 53 COST PARAMETERS



1  
2  
3 Costs for this systematic contact tracing activities were collected from the perspective of the  
4 operational program and the health facility and included recurrent and capital cost items. As  
5 capital costs for the building were not available, we approximated rent and utilities of running a  
6 similar structure, and we used these in place of the capital costs.  
7  
8  
9  
10  
11  
12  
13

14 We identified cost items and quantified resource use for all activities related to contact  
15 investigation. They included personnel, diagnostic test, supervision and monitoring by facility or  
16 project staff and communications. For the passive system, cost information was obtained from  
17 the health facility accounting system. We identified one physician and one health worker who  
18 were involved in the existing passive system at the TB clinic. We estimated their time spent on  
19 evaluation of household contacts through expert opinion and allocated salaries proportionate to  
20 this time as compared to other activities. Unit costs for TB diagnostic tests, chest x-rays, and  
21 smear microscopy were as billed to the project by the health facility. Costs for diagnostic tests  
22 were estimated by multiplying their unit costs with the number of people tested. As  
23 communications, supervision and training costs for the existing passive program were not  
24 available through the facility records, we assumed the same costs as incurred by the enhanced  
25 contact investigation intervention. At the TB clinic, data was collected on paper-based systems  
26 and the costs for registers and forms are reported with stationary.  
27  
28  
29  
30  
31  
32  
33  
34  
35  
36  
37  
38  
39  
40  
41  
42  
43  
44  
45  
46

47 For the additional costs of performing enhanced and active contact investigations, data were  
48 extracted from the project accounting system. One full-time health worker was recruited for  
49 enhanced intervention while the active contact investigation required three additional health  
50 workers. A fixed amount of travel costs for home visits was built into the salary for health  
51  
52  
53  
54  
55  
56  
57  
58  
59  
60

1  
2  
3 workers. For all other personnel such as physician, field supervisor and program coordinators,  
4  
5 time spent on the contact investigation intervention was estimated using an activity-based costing  
6  
7 (ABC) methodology, and costs were allocated according to the proportion of time spent on the  
8  
9 intervention relative to other activities.<sup>27,28</sup> Cost of diagnostic investigations per person screened  
10  
11 (chest x-ray, smear microscopy and complete blood), communications (data and phone), training  
12  
13 and stationery were as incurred. The cost for the development of electronic data capture was  
14  
15 allocated based on the number of patients screened in each intervention, while the cost of phones  
16  
17 and laptops used to capture data were allocated as per the personnel time that used them. We  
18  
19 annuitized these capital costs over a period of three years using a 3% discount rate.<sup>29,30</sup> Costs  
20  
21 were collected in Pakistan Rupees and converted to US dollars using the average exchange rate  
22  
23 for the years 2015 and 2016 (1 USD =103.1 PKR).  
24  
25  
26  
27  
28  
29

## 30 EFFECTIVENESS OF CONTACT INVESTIGATION

31  
32 The effectiveness of the contact investigation procedure was evaluated based on the  
33  
34 number of people with TB identified per household screened after verbal screening and  
35  
36 diagnostic tests. Our study was divided into baseline and intervention periods. Historical  
37  
38 data for passive contact investigation was used as the comparator. In the year preceding  
39  
40 the intervention, the passive approach screened 762 contacts from a total of 231 index  
41  
42 patient households to identify 21 people with TB during this baseline period (Figure 1).  
43  
44  
45 During the intervention period, enhanced and active contact investigation were  
46  
47 implemented, and contacts from 300 households were evaluated. Of these, 1130 people  
48  
49 from 144 families came to the health facility after phone reminders (enhanced) and 102  
50  
51 were diagnosed with TB. When home visits were conducted for 156 households that  
52  
53  
54  
55  
56  
57  
58  
59  
60

1  
2  
3  
4  
5  
6  
7  
8  
9  
10  
11  
12  
13  
14  
15  
16  
17  
18  
19  
20  
21  
22  
23  
24  
25  
26  
27  
28  
29  
30  
31  
32  
33  
34  
35  
36  
37  
38  
39  
40  
41  
42  
43  
44  
45  
46  
47  
48  
49  
50  
51  
52  
53  
54  
55  
56  
57  
58  
59  
60

failed to respond to the enhanced strategy (active), we evaluated 1224 people and identified 53 additional people with TB disease (Figure 1).

For peer review only

## DECISION MODEL AND ANALYSIS

A simple decision tree was created in TreeAge Pro 2020 (TreeAge Pro Inc., Williamston, MA) to estimate the cost-effectiveness of enhanced and active contact investigation compared to passive contact investigation. The decision tree includes the three alternatives for contact investigation; (i) Passive, (ii) Passive + Enhanced and (iii) Passive + Enhanced +Active (Figure 2). The three intervention alternatives represent different levels of intensity of contact investigation and are considered to be mutually exclusive. The more intense alternatives are more expensive than the less intensive ones, but also represent new possibilities for identifying contacts with TB (Table 1). The results are presented as absolute and incremental costs and TB patients identified, and incremental cost-effectiveness ratios (ICERs) between the alternatives.

We conducted probabilistic sensitivity analyses (PSA) using Monte Carlo simulations with 10,000 iterations to explore the effects of combined uncertainties in key parameters. Gamma distributions were used for cost parameters, and beta distributions for the probability of TB patients per family screened.<sup>31</sup> For sensitivity analyses, upper and lower values were defined for each parameter as mean values  $\pm 20\%$ .

Ethical approval was obtained from the Institutional Review Board (IRB) of Interactive Research and Development (IRD), OHRP Registration No. 00005148.

**Table 1: Modeling inputs, assumptions and ranges for passive, enhanced and active contact investigation (CI).**

| <b>Interventions</b>           | <b>Total cost (USD)</b> | <b>Index patient with TB</b> | <b>Total contacts diagnosed with TB (Lower and Upper limit)</b> | <b>Cost per index TB patient family screened (USD)</b> | <b>Probability of finding a TB patient per household screened (Lower and Upper limit)</b> |
|--------------------------------|-------------------------|------------------------------|-----------------------------------------------------------------|--------------------------------------------------------|-------------------------------------------------------------------------------------------|
| Passive CI                     | 10,659                  | 231                          | 21 (17– 25)                                                     | 46 (37-55)                                             | 0.09 (0.07 – 0.10)                                                                        |
| Passive + Enhanced CI          | 19,597                  | 300                          | 102 (82 – 122)                                                  | 76 (61 – 91)                                           | 0.34 (0.27 – 0.40)                                                                        |
| Passive + Enhanced + Active CI | 32,282                  | 300                          | 155 (124 – 186)                                                 | 118 (94 – 142)                                         | 0.52 (0.41 – 0.62)                                                                        |

## Results

In the enhanced and active contact tracing, 2,354 household contacts from 300 index patients were screened, of whom 49% were children less than 15 years of age, and 45% were female. The mean age for child contacts was 6.4 years (SD 3.7, IQR: 3-9), and 54% were males and the mean age for adult contacts was 33 years (SD 13.4, IQR: 21-41) and 53% were males. The enhanced contact investigation intervention was able to find 2.45 times (95% CI: 1.52 – 4.14) more people with TB than the passive program when it was implemented. While the active intervention implemented three weeks following the index patient counselling identified 2.11 times (95% CI: 1.33 – 3.52) more people with TB compared to passive contact investigation.

Overall, the passive program incurred USD 10,659 over one year and it cost USD 46 per household screened with TB. The enhanced contact investigation incurred an additional USD 30 to screen a household with an overall addition of USD 8,938 to the yearly program cost. Of the additional costs, human resources (42%) and electronic data collection (24%) were the most significant cost drivers. Active contact investigation incurred an additional USD 42 per household screened for TB above the enhanced model, and the program cost a further USD 12,685 to the enhanced contact investigation of which human resources (57%) and electronic data capture (18%) were the largest components. (Table 2)

**Table 2: Cost (USD) of household contact screening for passive, enhanced and active contact investigation activities (upper panel), and cumulative costs per intervention arm (lower panel).**

| <b>INTERVENTION ACTIVITIES</b>                                                                 | <b>Passive contact investigation<br/>N=231 (%)</b> | <b>Enhanced contact investigation<br/>N=300 (%)</b> | <b>Active contact investigation<br/>N=300 (%)</b> |
|------------------------------------------------------------------------------------------------|----------------------------------------------------|-----------------------------------------------------|---------------------------------------------------|
| <b>Cost categories</b>                                                                         |                                                    |                                                     |                                                   |
| <b><u>Recurrent costs:</u></b>                                                                 |                                                    |                                                     |                                                   |
| Clinic rental and maintenance                                                                  | 3,492 (33)                                         | -                                                   | -                                                 |
| Personnel                                                                                      | 5,354 (50)                                         | 3,835 (42)                                          | 7,348 (57)                                        |
| Diagnostic tests                                                                               | 1,478 (14)                                         | 2,192 (24)                                          | 2,374 (18)                                        |
| Supervision and monitoring                                                                     | 116 (1)                                            | 195 (2)                                             | 39 (0)                                            |
| Communication                                                                                  | 58 (1)                                             | 204 (2)                                             | 204 (2)                                           |
| Training                                                                                       | 72 (1)                                             | 72 (1)                                              | 70 (1)                                            |
| Stationary                                                                                     | 88 (1)                                             | 22 (0)                                              | 24 (0)                                            |
| <b>Subtotal recurrent costs</b>                                                                | <b>10,659</b>                                      | <b>6,520</b>                                        | <b>10,096</b>                                     |
| <b><u>Capital costs:</u></b>                                                                   |                                                    |                                                     |                                                   |
| Equipment                                                                                      | -                                                  | 407 (4)                                             | 407 (3)                                           |
| Data collection system and maintenance                                                         | -                                                  | 2,236 (24)                                          | 2,422 (19)                                        |
| <b>Subtotal capital costs</b>                                                                  |                                                    | <b>2,463</b>                                        | <b>2,829</b>                                      |
| <b>Annuitized capital costs (3% discount rate)</b>                                             |                                                    | <b>2,419</b>                                        | <b>2,589</b>                                      |
| <b>Total costs per activity</b>                                                                | <b>10,659</b>                                      | <b>8,938</b>                                        | <b>12,685</b>                                     |
| <b>Total costs per activity per index patient</b>                                              | <b>46</b>                                          | <b>30</b>                                           | <b>42</b>                                         |
| <b>INTERVENTION ARM</b>                                                                        | <b>Passive</b>                                     | <b>Passive + Enhanced</b>                           | <b>Passive + Enhanced + Active</b>                |
| <b>Total cumulated costs per index patient per arm for household contacts evaluated for TB</b> | <b>46</b>                                          | <b>76</b>                                           | <b>118</b>                                        |
| <b>Number of contacts diagnosed with TB</b>                                                    | <b>21</b>                                          | <b>123</b>                                          | <b>176</b>                                        |

The passive + enhanced contact investigation of one index patient was 3.8 times more effective than passive contact investigation alone, increasing absolute case detection rate from 0.09 to 0.34. The incremental cost was USD 30 per index patient, which yielded an incremental cost of USD 120 per incremental patient identified with TB. While the passive + enhanced + active contact investigation of one index patient was 1.5 times more effective than enhanced contact investigation with an incremental cost of USD 238 per incremental TB patient identified as compared to the baseline passive approach (Table 3).

**Table 3: Incremental cost-effectiveness of household contact screening for passive, enhanced and active contact investigation interventions from the TB program perspective.**

| Strategy                                          | Cost per strategy (C) | Incremental Cost (IC) | Effect (E) | Incremental Effect (IE) | ICER |
|---------------------------------------------------|-----------------------|-----------------------|------------|-------------------------|------|
| Passive contact investigation                     | 46                    |                       | 0.09       |                         |      |
| Passive + Enhanced contact investigation          | 76                    | 30                    | 0.34       | 0.25                    | 120  |
| Passive + Enhanced + Active contact investigation | 118                   | 42                    | 0.52       | 0.18                    | 238  |

The cost-effectiveness acceptability curves (CEACs) illustrate the probabilities that each intervention is cost-effective for a range of willingness to pay for health when taking the combined parameter uncertainty into account. The enhanced strategy becomes optimal if the willingness to pay exceeds USD 120 per additional patient with TB that is identified. If willingness to pay exceeds about 238 USD per TB case identified,<sup>32</sup> the active contact investigation has the highest probability of being cost-effective of the three alternatives (Figure 3).



1  
2  
3  
4  
5 One-way sensitivity analyses were conducted to explore the impact of uncertainties in single  
6 model parameters. These are represented in a tornado diagram in the decreasing order of the  
7 parameters' potential influence on the ICER (Figure 4). As the passive contact investigation is  
8 standard we plotted the tornado diagram for enhanced vs active contact investigation strategies.  
9  
10 Cost and effect parameters were varied over a predetermined range (Table 1). The ICER was  
11 most sensitive to the probability of identifying a patient through active case finding, and ranged  
12 between some 150 and 600 USD per case detected when probabilities were varied between 0.62  
13 and 0.41, respectively.  
14  
15  
16  
17  
18  
19  
20  
21  
22  
23  
24  
25  
26  
27

## 28 **Discussion**

29  
30 The enhanced contact investigation strategy, in combination with the passive system, was 3.8  
31 times more likely to identify patients with TB amongst household contacts than the passive  
32 contact investigation alone. The addition of household visits further improved case detection and  
33 may be necessary if we are to achieve the End TB strategy goals.<sup>33</sup> Unsurprisingly, both the  
34 enhanced and active strategies require more resources than the existing passive scheme, and the  
35 additional benefits must therefore be weighed against their additional costs, but increased  
36 performance and output requires more funding for impactful interventions.<sup>34</sup>  
37  
38  
39  
40  
41  
42  
43  
44  
45  
46  
47  
48  
49

50 Studies and systematic reviews have documented that enhanced or active household contact  
51 investigation has been able to find more people with TB compared to passive case  
52 finding.<sup>24,25,35,22</sup> These studies further conclude that improved case detection is cost-effective  
53  
54  
55  
56  
57  
58  
59  
60

1  
2  
3 compared to the passive approach. Contact investigation can be conducted in a myriad of ways  
4 and using different algorithms and approaches.<sup>17</sup> Many programs opt for a more passive  
5 approach due to the ease of implementation and lower costs. However, there have been no  
6 studies we could identify that have compared different modalities of contact investigation to each  
7 other. The WHO guidelines identify that comparisons of different types of contact investigation  
8 is a current knowledge gap and our findings aid this void and should be followed by additional  
9 studies with costing analyses.  
10  
11  
12  
13  
14  
15  
16  
17  
18  
19  
20

21 In low-burden countries, contact investigation is a requirement for a TB program to be  
22 effective.<sup>36</sup> According to the US Centers for Disease Control and Prevention, it played an  
23 essential role in decreasing TB incidence by 44% in the USA.<sup>37</sup> A meta-analysis suggests that TB  
24 contact investigation should be considered to improve early TB case detection and decrease  
25 transmission in high-incidence areas as well.<sup>13</sup> However, in low- and middle-income countries,  
26 contact investigation has been viewed as expensive and, therefore, a low-priority. Programs do  
27 not undertake TB contact investigation as they have limited human resources. This project added  
28 health workers to support phone calls, counselling, and home visits, which led to an increase in  
29 costs. However, these are necessary costs if we are to reach all people with TB. With contact  
30 investigation, people with TB are diagnosed early and initiated on treatment, which benefits the  
31 broader community by reducing continuing transmission.<sup>38</sup> These benefits of future TB cases  
32 prevented over time are not captured by the current analytical model, and in this regard our  
33 results can be considered to be conservative. If contact investigation interventions result in  
34 earlier detection of household contacts with active TB, this program would reduce the spread of  
35 TB in the community even more effectively and be even more cost-effectively.  
36  
37  
38  
39  
40  
41  
42  
43  
44  
45  
46  
47  
48  
49  
50  
51  
52  
53  
54  
55  
56  
57  
58  
59  
60

1  
2  
3 Our study is subject to limitations. We initiated the enhanced intervention if the family did not  
4 come to the clinic for evaluation within one week of a TB patient diagnosed and initiated on  
5 treatment. The passive system, if given more time than one week may potentially have had a  
6 larger yield. However, the historical data shows that the number of people identified by the  
7 passive system during the implementation phase was similar to what we estimated in the baseline  
8 survey. Secondly, we only consider people with TB detected and did not consider outcomes of  
9 subsequent treatment in this analytical model. But in the larger project, in which this study was  
10 embedded, 98% of children diagnosed with TB were started on treatment and had over 94%  
11 treatment success rate.<sup>26, 39</sup> Thirdly, out-of-pocket expenditures for patients was not considered.  
12 Costs such as transportation to the health facilities for evaluation, cost of diagnostic tests and loss  
13 of work time may be potential barriers for the majority of the TB affected families coming to the  
14 health facilities for evaluation. Arrangements for transportation of contacts to health facilities for  
15 diagnostic tests and transportation of sputum specimens for examination should be included in  
16 the national policy to increase the detection of TB patients. Lastly, the household with child TB  
17 is likely to have transmission within the household making contact investigation efficient and  
18 cost-effective in these contacts, but it may not be generalizable in household with an adult TB  
19 patients. Future research may consider to conduct similar costing studies in the urban areas as the  
20 cost may be different than the rural setting in which our study was based and to integrate data on  
21 the overall economic burden to households that can be averted with an active TB contact  
22 investigation program. In addition, the study was conducted at only one center, and other health  
23 facilities with different levels of pre-existing capacity and infrastructure may yield different cost-  
24 estimates.  
25  
26  
27  
28  
29  
30  
31  
32  
33  
34  
35  
36  
37  
38  
39  
40  
41  
42  
43  
44  
45  
46  
47  
48  
49  
50  
51  
52  
53  
54  
55  
56  
57  
58  
59  
60

1  
2  
3 An important strength of the study is that it was performed alongside implementation in district  
4 tuberculosis clinics in a high-prevalence setting. Data were therefore collected prospectively in a  
5 programmatic setting. A robust monitoring and evaluation system was put in place, and the  
6 District TB Control officers verified all notifications as would have been done in routine scale  
7 up.  
8  
9  
10  
11  
12  
13  
14  
15  
16  
17

### 18 **Conclusion**

19  
20 Our results show that active approaches to contact investigation identify more people with TB  
21 amongst household contacts at a relatively modest cost addressing an identified global  
22 knowledge gap. These strategies can be added to passive contact investigation approaches in a  
23 high burden setting to find the missing TB patients and meet the End TB strategy goals.  
24  
25  
26  
27  
28  
29  
30  
31  
32  
33  
34  
35  
36  
37  
38  
39  
40  
41  
42  
43  
44  
45  
46  
47  
48  
49  
50  
51  
52  
53  
54  
55  
56  
57  
58  
59  
60

1  
2  
3  
4  
5 Figure 1: Household contacts evaluated and diagnosed for TB by passive, enhanced and active  
6 contact investigation interventions.  
7  
8  
9

10  
11  
12  
13 Figure 2: Decision tree for household contacts evaluated for TB by passive, enhanced and active  
14 contact investigation interventions.  
15  
16  
17

18  
19  
20 Figure 3: Cost-effectiveness acceptability curves for passive, enhanced and active contact  
21 investigation interventions for a range of willingness to pay per household screened.  
22  
23  
24

25  
26  
27 Figure 4: One-way sensitivity analyses for the ICERs of enhanced contact investigation  
28 compared to active contact investigation.  
29  
30  
31

1  
2  
3  
4  
5 **Author Contributions:** Conception: HH, AAM, FA Data collection: HH, AAM, SS, and FJA.

6  
7 Analysis: HH, AAM and BR Writing: HH, AAM, JFA, SS, FA, JC, TT, BR  
8  
9  
10  
11

12 **Funding:** Active case finding from October 2014 to March 2016 was supported through Stop TB  
13 Partnership's TB REACH initiative. TB REACH is generously supported by Global Affairs  
14 Canada. Active case finding from October 2016 to March 2018 was supported through The  
15 Global Fund. Award/Grant number is not applicable.  
16  
17  
18  
19  
20  
21  
22  
23

24 **Competing Interests:** None declared  
25  
26

27 **Patient consent for publication:** Not required.  
28  
29

30 **Ethics approval:** This study was approved by the Institutional Review Board (IRB) of  
31 Interactive Research and Development (IRD), OHRP Registration No. 00005148.  
32  
33  
34

35 **Data sharing statement:** No data are available. Costing data were collected by the research  
36 team which are confidential.  
37  
38  
39

40 **Patient and public involvement statement:** No patient involved  
41  
42  
43  
44  
45  
46  
47  
48  
49  
50  
51  
52  
53  
54  
55  
56  
57  
58  
59  
60

## References

---

- 1 The World Health Organization. Global tuberculosis report 2019. Geneva: World Health Organization; 2019.
- 2 World Health Organization. Global tuberculosis report 2020. Geneva, World Health Organization; 2020.
- 3 The Global Fund. Tuberculosis 2018. Accessed on Nov 15, 2020 at <https://www.theglobalfund.org/en/tuberculosis/>
- 4 Vyas A, Creswell J, Codlin AJ, Stevens R, Rao VG, Kumar B, Khaparde S, Sahu S. Community-based active case-finding to reach the most vulnerable: tuberculosis in tribal areas of India. *Int J Tuberc Lung Dis*. 2019 Jun 1;23(6):750-755.
- 5 Claassens MM, Jacobs E, Cyster E, Jennings K, James A, Dunbar R, Enarson DA, Borgdorff MW, Beyers N. Tuberculosis cases missed in primary health care facilities: should we redefine case finding? *Int J Tuberc Lung Dis*. 2013 May;17(5):608-14.
- 6 MacPherson, Peter, Houben, Rein MGJ, Glynn, Judith R, Corbett, Elizabeth L & Kranzer, Katharina. (2014). Pre-treatment loss to follow-up in tuberculosis patients in low- and lower-middle-income countries and high-burden countries: a systematic review and meta-analysis. *Bulletin of the World Health Organization*, 92 (2), 126 - 138.
- 7 Davies P. The natural history of tuberculosis in children. A study of child contacts in the Brompton Hospital Child Contact Clinic from 1930 to 1952. *Tubercle* 1961;42 (Suppl):1-40
- 8 Starke JR, Jacobs RF, Jereb J. Resurgence of tuberculosis in children. *The Journal of pediatrics* 1992;120:839-855
- 9 Bloom BR, Murray CJ. Tuberculosis: commentary on a reemergent killer. *Science* 1992;257:1055-1064
- 10 Vynnycky E, Fine PE. Lifetime risks, incubation period, and serial interval of tuberculosis. *American journal of epidemiology* 2000;152:247-263
- 11 Devadatta S, Dawson J, Fox W, et al. Attack rate of tuberculosis in a 5-year period among close family contacts of tuberculous patients under domiciliary treatment with isoniazid plus PAS or isoniazid alone. *Bulletin of the World Health Organization* 1970; 42(3): 337–351

1  
2  
3  
4 12 Schaaf HS, Gie RP, Kennedy M, Beyers N, Hesselning PB, Donald PR. Evaluation of young  
5 children in contact with adult multidrug-resistant pulmonary tuberculosis: a 30-month follow-up.  
6 *Pediatrics* 2002;109:765-771  
7

8  
9 13 World Health Organization. Recommendations for investigating contacts of persons with  
10 infectious tuberculosis in low- and middle-income countries. Geneva, Switzerland: World Health  
11 Organization; 2012.  
12

13 14 Morrison J, Pai M, Hopewell PC. Tuberculosis and latent tuberculosis infection in close  
15 contacts of people with pulmonary tuberculosis in low-income and middle-income countries: a  
16 systematic review and meta-analysis. *The Lancet Infectious diseases*. 2008 Jun;8(6):359-68  
17

18 15 Fox GJ, Barry SE, Britton WJ, Marks GB: Contact investigation for tuberculosis: a systematic  
19 review and meta-analysis. *Eur Respir J* 2013, 41:134–150  
20

21 22 Fox GJ, Nhung NV, Sy DN, Britton WJ, Marks GB. Household contact investigation for  
23 tuberculosis in Vietnam: study protocol for a cluster randomized controlled  
24 trial. *Trials*. 2013;14:342  
25

26 27 Blok L, Sahu S, Creswell J, Alba S, Stevens R, Bakker MI. (2015) Comparative Meta-  
28 Analysis of Tuberculosis Contact Investigation Interventions in Eleven High Burden Countries.  
29 *PLOS ONE* 2015;10:e0119822.  
30

31 18 World Health Organization. Recommendations for investigating contacts of persons with  
32 infectious tuberculosis in low- and middle-income countries. Geneva: World Health  
33 Organization 2012.  
34

35 19 World Health Organization. Systematic Screening for Active Tuberculosis: Principles and  
36 Recommendations. Geneva: World Health Organization 2013.  
37

38 39 20 Hwang TJ, Ottmani S, Uplekar M. A rapid assessment of prevailing policies on tuberculosis  
40 contact investigation. *The International Journal of Tuberculosis and Lung Disease* 2011;15:1620  
41 3  
42

43 21 Shah SA, Qayyum S, Abro R, Baig S, Creswell J. Active contact investigation and treatment  
44 support: an integrated approach in rural and urban Sindh, Pakistan. *Int J Tuberc Lung Dis*. 2013  
45 Dec;17(12):1569-74.  
46

47 48 22 Fox GJ, Nhung NV, Sy DN, et al. Household-contact investigation for detection of  
49 Tuberculosis in Vietnam. *New England Journal of Medicine* 2018;378:221-9  
50

51 23 Tesfaye L, Lemu YK, Tareke KG, Chaka M, Feyissa GT. Exploration of barriers and  
52 facilitators to household contact tracing of index tuberculosis cases in Anlemo district, Hadiya  
53 zone, Southern Ethiopia: Qualitative study. *PLOS ONE* 2020;15:e0233358  
54  
55  
56  
57  
58  
59



1  
2  
3  
4  
5  
6  
7  
8  
9  
10  
11  
12  
13  
14  
15  
16  
17  
18  
19  
20  
21  
22  
23  
24  
25  
26  
27  
28  
29  
30  
31  
32  
33  
34  
35  
36  
37  
38  
39  
40  
41  
42  
43  
44  
45  
46  
47  
48  
49  
50  
51  
52  
53  
54  
55  
56  
57  
58  
59  
60

---

<sup>24</sup> Atif M, Sulaiman SAS, Shafie AA, Ali I, Asif M. Tracing contacts of TB patients in Malaysia: costs and practicality. SpringerPlus 2012;1:40

<sup>25</sup> Shah L, Rojas M, Mori O, Zamudio C, Kaufman JS, Otero L, Gotuzzo E, Seas C, Brewer TF. Cost-effectiveness of active case finding of household contacts of pulmonary tuberculosis patients in a low HIV, tuberculosis-endemic urban area of Lima, Peru. *Epidemiol Infect.* 2017 Apr;145(6):1107-1117.

<sup>26</sup> Malik AA, Amanullah F, Codlin AJ, Siddiqui S, Jaswal M, Ahmed JF, Saleem S, Khurshid A, Hussain H. Improving childhood tuberculosis detection and treatment through facility-based screening in rural Pakistan. *Int J Tuberc Lung Dis.* 2018 Aug 1; 22(8): 851–857.

<sup>27</sup> Waters H, Abdallah H, Santillan D. Application of activity-based costing (ABC) for a Peruvian NGO healthcare provider. *Int J Health Plann Manage* 2001;16:3-18.

<sup>28</sup> Hussain H, Waters H, Omer SB, et al. The cost of treatment for child pneumonias and meningitis in the Northern Areas of Pakistan. *Int J Health Plann Manage* 2006;21:229-38

<sup>29</sup> Bergmo TS. How to Measure Costs and Benefits of eHealth Interventions: An Overview of Methods and Frameworks. *J Med Internet Res.* 2015 Nov 9;17(11):e254.

<sup>30</sup> Drummond M, Sculpher M, Torrance G, O'Brien B, Stoddart G. *Methods for the Economic Evaluation of Health Care Programmes.* 3rd edition. Oxford, UK: Oxford University Press; 2005.

<sup>31</sup> Gray AM, Clarke PM, Wolstenholme JL, Wordsworth S. *Applied methods of cost-effectiveness analysis in healthcare.* United States: Oxford University Press; 2010.

<sup>32</sup> Shillcutt SD, Walker DG, Goodman CA, Mills AJ: Cost-Effectiveness in Low- and Middle-Income Countries: A Review of the Debates Surrounding Decision Rules. *Pharmacoeconomics* 2009, 27:903–917

<sup>33</sup> The World Health Organization. *The End TB Strategy, Global strategy and targets for tuberculosis prevention, care and control after 2015.* World Health Organization 2018.

<sup>34</sup> Stop TB Partnership. *UN high-level meeting on TB key targets & commitments for 2022.* Geneva, Switzerland: Stop TB Partnership; 2018

<sup>35</sup> Htet KK, Liabsuetrakul T, Thein S. Cost-effectiveness of a new strategy to detect pulmonary tuberculosis in household contacts in Myanmar. *Int J Tuberc Lung Dis.* 2017 Feb 1;21(2):181-187.

<sup>36</sup> Joint Tuberculosis Committee Of The British Thoracic S. *Control and prevention of tuberculosis in the United Kingdom: Code of Practice 2000.* *Thorax* 2000;55:887-901.

1  
2  
3  
4  
5  
6  
7  
8  
9  
10  
11  
12  
13  
14  
15  
16  
17  
18  
19  
20  
21  
22  
23  
24  
25  
26  
27  
28  
29  
30  
31  
32  
33  
34  
35  
36  
37  
38  
39  
40  
41  
42  
43  
44  
45  
46  
47  
48  
49  
50  
51  
52  
53  
54  
55  
56  
57  
58  
59  
60

---

<sup>37</sup> Taylor Z, Nolan CM, Blumberg HM, American Thoracic Society, Centers for Disease Control and Prevention, Infectious Diseases Society of America. Controlling tuberculosis in the United States Recommendations from the American Thoracic Society, CDC, and the Infectious Diseases Society of America. *MMWR Recomm Rep.* 2005 Nov 4; 54 (RR-12) :1-81

<sup>38</sup> Dowdy DW, Basu S, Andrews JR. Is passive diagnosis enough? The impact of subclinical disease on diagnostic strategies for tuberculosis. *Am J Respir Crit Care Med* 2013; 187: 543-51

<sup>39</sup> High yields from contact investigation of child index TB patients. Malik A. A, Amanullah F, Jaswal M, Siddiqui S, Ahmed, J. F, Creswell J, Hussain H. *Int J Tuberc Lung Dis.* 24(8):850–852

**Figure 1: Household contacts evaluated and diagnosed for TB by passive, enhanced and active contact investigation interventions.**

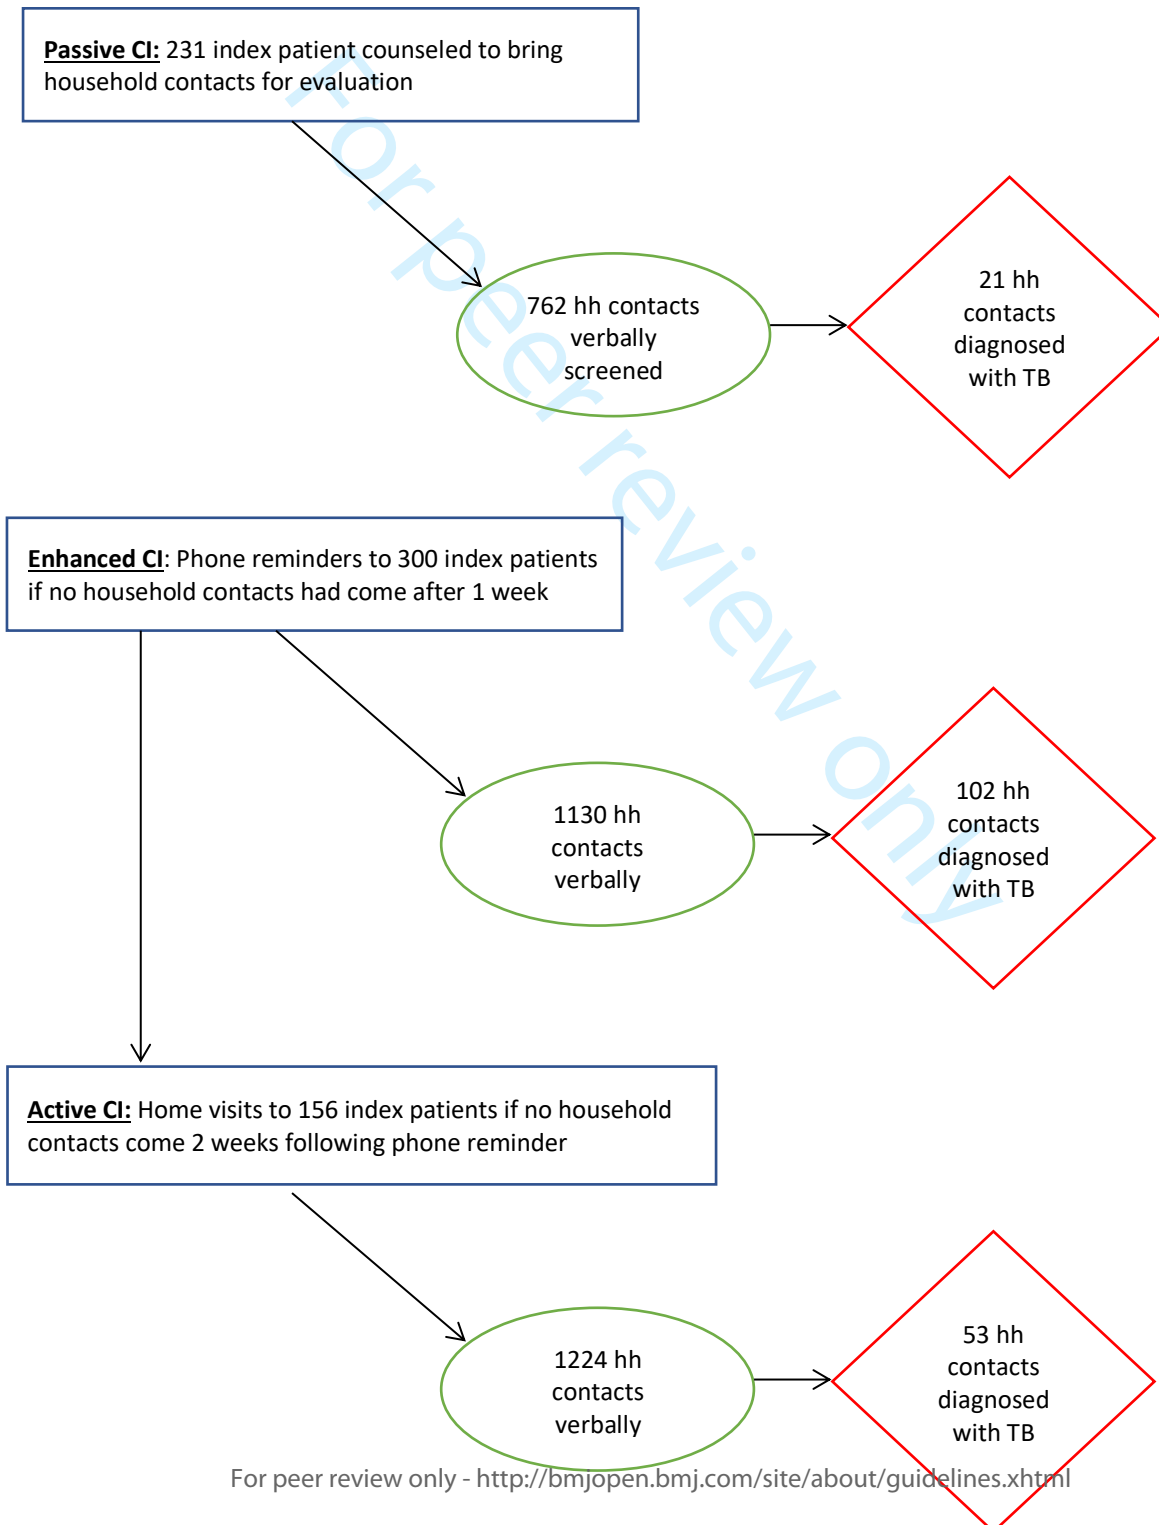

**Figure 2: Decision tree for household contacts evaluated for TB by passive, enhanced and active contact investigation interventions.**

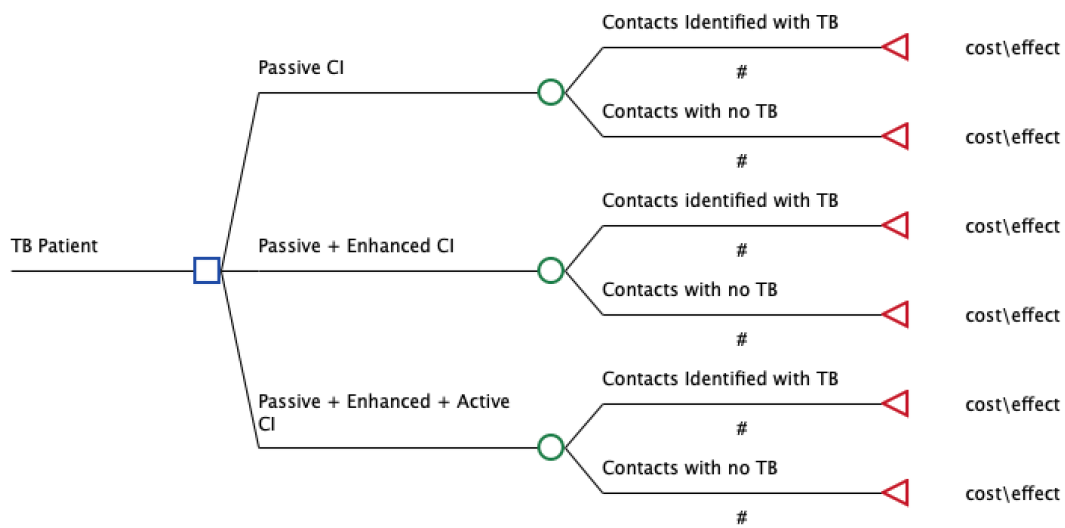

view only

Figure 3: Cost-effectiveness acceptability curves for passive, enhanced and active contact investigation interventions for a range of willingness to pay per household screened.

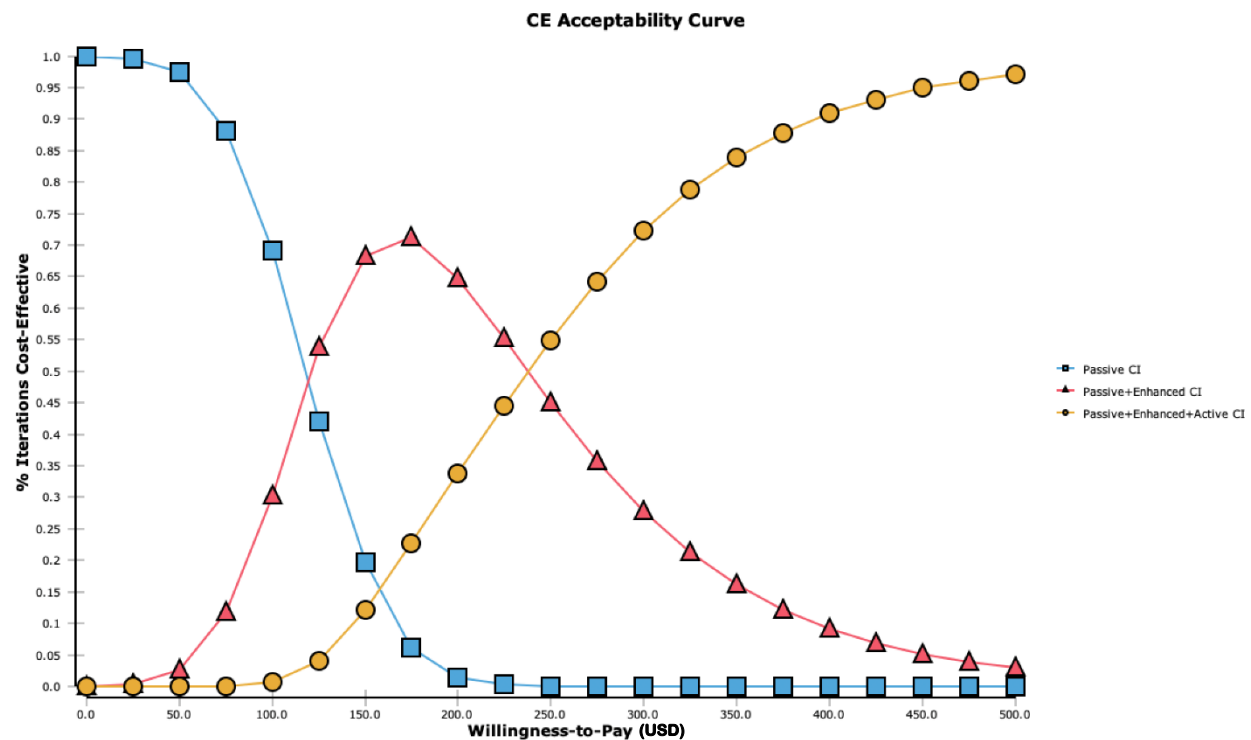

Figure 4: One-way sensitivity analyses for the ICERs of enhanced contact investigation compared to active contact investigation.\*



\*The black bar denoted the lower part of the parameter range and the red bar shows the higher part of the parameter range. If red bar is on the grey of the expected value (EV) it means that the ICER will increase when the parameter value increase. When the red bar is on the left then the ICER will decrease with the increase in parameter value.

# Reporting checklist for economic evaluation of health interventions.

Based on the CHEERS guidelines.

## Instructions to authors

Complete this checklist by entering the page numbers from your manuscript where readers will find each of the items listed below.

Your article may not currently address all the items on the checklist. Please modify your text to include the missing information. If you are certain that an item does not apply, please write "n/a" and provide a short explanation.

Upload your completed checklist as an extra file when you submit to a journal.

In your methods section, say that you used the CHEERS reporting guidelines, and cite them as:

Husereau D, Drummond M, Petrou S, Carswell C, Moher D, Greenberg D, Augustovski F, Briggs AH, Mauskopf J, Loder E. Consolidated Health Economic Evaluation Reporting Standards (CHEERS) statement.

|                           | Reporting Item                                                                                                                                                                                            | Page Number  |
|---------------------------|-----------------------------------------------------------------------------------------------------------------------------------------------------------------------------------------------------------|--------------|
| <b>Title</b>              |                                                                                                                                                                                                           |              |
|                           | <a href="#">#1</a> Identify the study as an economic evaluation or use more specific terms such as “cost-effectiveness analysis”, and describe the interventions compared.                                | Page 1       |
| <b>Abstract</b>           |                                                                                                                                                                                                           |              |
|                           | <a href="#">#2</a> Provide a structured summary of objectives, perspective, setting, methods (including study design and inputs), results (including base case and uncertainty analyses), and conclusions | Page 2 and 3 |
| <b>Introduction</b>       |                                                                                                                                                                                                           |              |
| Background and objectives | <a href="#">#3</a> Provide an explicit statement of the broader context for the study. Present the study question and its relevance for health policy or practice decisions                               | Pages 5-7    |
| <b>Methods</b>            |                                                                                                                                                                                                           |              |

|    |                         |                      |                                                                    |         |
|----|-------------------------|----------------------|--------------------------------------------------------------------|---------|
| 1  | Target population and   | <a href="#">#4</a>   | Describe characteristics of the base case population and           | Page 7  |
| 2  | subgroups               |                      | subgroups analysed, including why they were chosen.                |         |
| 3  |                         |                      |                                                                    |         |
| 4  | Setting and location    | <a href="#">#5</a>   | State relevant aspects of the system(s) in which the decision(s)   | Page 7  |
| 5  |                         |                      | need(s) to be made.                                                |         |
| 6  |                         |                      |                                                                    |         |
| 7  |                         |                      |                                                                    |         |
| 8  | Study perspective       | <a href="#">#6</a>   | Describe the perspective of the study and relate this to the costs | Page 9  |
| 9  |                         |                      | being evaluated.                                                   |         |
| 10 |                         |                      |                                                                    |         |
| 11 |                         |                      |                                                                    |         |
| 12 | Comparators             | <a href="#">#7</a>   | Describe the interventions or strategies being compared and        | Page 8  |
| 13 |                         |                      | state why they were chosen.                                        | and 9   |
| 14 |                         |                      |                                                                    |         |
| 15 |                         |                      |                                                                    |         |
| 16 | Time horizon            | <a href="#">#8</a>   | State the time horizon(s) over which costs and consequences are    | Page 8  |
| 17 |                         |                      | being evaluated and say why appropriate.                           | and 9   |
| 18 |                         |                      |                                                                    |         |
| 19 |                         |                      |                                                                    |         |
| 20 | Discount rate           | <a href="#">#9</a>   | Report the choice of discount rate(s) used for costs and           | Page 11 |
| 21 |                         |                      | outcomes and say why appropriate                                   |         |
| 22 |                         |                      |                                                                    |         |
| 23 |                         |                      |                                                                    |         |
| 24 | Choice of health        | <a href="#">#10</a>  | Describe what outcomes were used as the measure(s) of benefit      | Page 11 |
| 25 | outcomes                |                      | in the evaluation and their relevance for the type of analysis     | and 12  |
| 26 |                         |                      | performed                                                          |         |
| 27 |                         |                      |                                                                    |         |
| 28 |                         |                      |                                                                    |         |
| 29 | Measurement of          | <a href="#">#11a</a> | Single study-based estimates: Describe fully the design features   | Page 11 |
| 30 | effectiveness           |                      | of the single effectiveness study and why the single study was a   |         |
| 31 |                         |                      | sufficient source of clinical effectiveness data                   |         |
| 32 |                         |                      |                                                                    |         |
| 33 |                         |                      |                                                                    |         |
| 34 | Measurement of          | <a href="#">#11b</a> | Synthesis-based estimates: Describe fully the methods used for     |         |
| 35 | effectiveness           |                      | identification of included studies and synthesis of clinical       |         |
| 36 |                         |                      | effectiveness data                                                 |         |
| 37 |                         |                      |                                                                    |         |
| 38 |                         |                      |                                                                    |         |
| 39 |                         |                      |                                                                    |         |
| 40 | Measurement and         | <a href="#">#12</a>  | If applicable, describe the population and methods used to elicit  |         |
| 41 | valuation of preference |                      | preferences for outcomes.                                          |         |
| 42 | based outcomes          |                      |                                                                    |         |
| 43 |                         |                      |                                                                    |         |
| 44 |                         |                      |                                                                    |         |
| 45 | **Estimating resources  |                      |                                                                    |         |
| 46 |                         |                      |                                                                    |         |
| 47 | and costs **            |                      |                                                                    |         |
| 48 |                         |                      |                                                                    |         |
| 49 |                         |                      |                                                                    |         |
| 50 |                         | <a href="#">#13a</a> | Single study-based economic evaluation: Describe approaches        |         |
| 51 |                         |                      | used to estimate resource use associated with the alternative      |         |
| 52 |                         |                      | interventions. Describe primary or secondary research methods      |         |
| 53 |                         |                      | for valuing each resource item in terms of its unit cost. Describe |         |
| 54 |                         |                      | any adjustments made to approximate to opportunity costs           |         |
| 55 |                         |                      |                                                                    |         |
| 56 |                         |                      |                                                                    |         |
| 57 |                         |                      |                                                                    |         |
| 58 | <b>Methods</b>          |                      |                                                                    |         |
| 59 |                         |                      |                                                                    |         |
| 60 |                         |                      |                                                                    |         |



|    |                       |                      |                                                                    |          |
|----|-----------------------|----------------------|--------------------------------------------------------------------|----------|
| 1  | Estimating resources  | <a href="#">#13b</a> | Model-based economic evaluation: Describe approaches and           | Pages 9, |
| 2  | and costs             |                      | data sources used to estimate resource use associated with         | 10 and   |
| 3  |                       |                      | model health states. Describe primary or secondary research        | 11       |
| 4  |                       |                      | methods for valuing each resource item in terms of its unit cost.  |          |
| 5  |                       |                      | Describe any adjustments made to approximate to opportunity        |          |
| 6  |                       |                      | costs.                                                             |          |
| 7  |                       |                      |                                                                    |          |
| 8  |                       |                      |                                                                    |          |
| 9  |                       |                      |                                                                    |          |
| 10 | Currency, price date, | <a href="#">#14</a>  | Report the dates of the estimated resource quantities and unit     | Page 11  |
| 11 | and conversion        |                      | costs. Describe methods for adjusting estimated unit costs to the  |          |
| 12 |                       |                      | year of reported costs if necessary. Describe methods for          |          |
| 13 |                       |                      | converting costs into a common currency base and the exchange      |          |
| 14 |                       |                      | rate.                                                              |          |
| 15 |                       |                      |                                                                    |          |
| 16 |                       |                      |                                                                    |          |
| 17 |                       |                      |                                                                    |          |
| 18 |                       |                      |                                                                    |          |
| 19 | Choice of model       | <a href="#">#15</a>  | Describe and give reasons for the specific type of decision        | Page 12  |
| 20 |                       |                      | analytical model used. Providing a figure to show model            |          |
| 21 |                       |                      | structure is strongly recommended.                                 |          |
| 22 |                       |                      |                                                                    |          |
| 23 |                       |                      |                                                                    |          |
| 24 | Assumptions           | <a href="#">#16</a>  | Describe all structural or other assumptions underpinning the      | Page 11  |
| 25 |                       |                      | decision-analytical model.                                         |          |
| 26 |                       |                      |                                                                    |          |
| 27 |                       |                      |                                                                    |          |
| 28 | Analytical methods    | <a href="#">#17</a>  | Describe all analytical methods supporting the evaluation. This    | Page 12  |
| 29 |                       |                      | could include methods for dealing with skewed, missing, or         |          |
| 30 |                       |                      | censored data; extrapolation methods; methods for pooling data;    |          |
| 31 |                       |                      | approaches to validate or make adjustments (such as half cycle     |          |
| 32 |                       |                      | corrections) to a model; and methods for handling population       |          |
| 33 |                       |                      | heterogeneity and uncertainty.                                     |          |
| 34 |                       |                      |                                                                    |          |
| 35 |                       |                      |                                                                    |          |
| 36 |                       |                      |                                                                    |          |
| 37 |                       |                      |                                                                    |          |
| 38 | <b>Results</b>        |                      |                                                                    |          |
| 39 |                       |                      |                                                                    |          |
| 40 | Study parameters      | <a href="#">#18</a>  | Report the values, ranges, references, and, if used, probability   | Page 13  |
| 41 |                       |                      | distributions for all parameters. Report reasons or sources for    |          |
| 42 |                       |                      | distributions used to represent uncertainty where appropriate.     |          |
| 43 |                       |                      | Providing a table to show the input values is strongly             |          |
| 44 |                       |                      | recommended.                                                       |          |
| 45 |                       |                      |                                                                    |          |
| 46 |                       |                      |                                                                    |          |
| 47 |                       |                      |                                                                    |          |
| 48 |                       |                      |                                                                    |          |
| 49 | Incremental costs and | <a href="#">#19</a>  | For each intervention, report mean values for the main             | Page 15, |
| 50 | outcomes              |                      | categories of estimated costs and outcomes of interest, as well as | 16       |
| 51 |                       |                      | mean differences between the comparator groups. If applicable,     |          |
| 52 |                       |                      | report incremental cost-effectiveness ratios.                      |          |
| 53 |                       |                      |                                                                    |          |
| 54 |                       |                      |                                                                    |          |
| 55 | Characterising        | <a href="#">#20a</a> | Single study-based economic evaluation: Describe the effects of    | Page 16, |
| 56 | uncertainty           |                      | sampling uncertainty for the estimated incremental cost and        | 17       |
| 57 |                       |                      | incremental effectiveness parameters, together with the impact     |          |
| 58 |                       |                      |                                                                    |          |
| 59 |                       |                      |                                                                    |          |
| 60 |                       |                      |                                                                    |          |

of methodological assumptions (such as discount rate, study perspective).

1  
2  
3  
4 Characterising [#20b](#) Model-based economic evaluation: Describe the effects on the Page 17  
5 uncertainty results of uncertainty for all input parameters, and uncertainty  
6 related to the structure of the model and assumptions.  
7

8  
9 Characterising [#21](#) If applicable, report differences in costs, outcomes, or cost  
10 heterogeneity effectiveness that can be explained by variations between  
11 subgroups of patients with different baseline characteristics or  
12 other observed variability in effects that are not reducible by  
13 more information.  
14  
15

## 16 Discussion

17  
18  
19  
20 Study findings, [#22](#) Summarise key study findings and describe how they support Page 17,  
21 limitations, the conclusions reached. Discuss limitations and the 18, 19  
22 generalisability, and generalisability of the findings and how the findings fit with  
23 current knowledge current knowledge.  
24  
25

## 26 Other

27  
28  
29 Source of funding [#23](#) Describe how the study was funded and the role of the funder in Page 22  
30 the identification, design, conduct, and reporting of the analysis.  
31 Describe other non-monetary sources of support  
32  
33

34 Conflict of interest [#24](#) Describe any potential for conflict of interest of study Page 22  
35 contributors in accordance with journal policy. In the absence of  
36 a journal policy, we recommend authors comply with  
37 International Committee of Medical Journal Editors  
38 recommendations  
39  
40  
41  
42

43 None The CHEERS checklist is distributed under the terms of the Creative Commons Attribution License CC-  
44 BY-NC. This checklist can be completed online using <https://www.goodreports.org/>, a tool made by the  
45 [EQUATOR Network](#) in collaboration with [Penelope.ai](#)  
46  
47  
48  
49  
50  
51  
52  
53  
54  
55  
56  
57  
58  
59  
60
